# Supplementary material for: Redox, spectroscopic and magnetic properties of C 3 -symmetric rare earth complexes featuring atypical ortho -dioxolene binding
Source: Royal Society of Chemistry journal article supplement (doi:10.1039/d4dt03474k), 2025-01-01
Supplement: d4dt03474k1.pdf [file d4dt03474k1.pdf]

*Supporting Information to accompany*

***Redox, Spectroscopic and Magnetic Properties of C3-Symmetry Rare Earth Complexes Featuring Atypical Ortho-Dioxolene Binding***

Stanley Bagio, Jonay González, Robert W. Gable, Christopher R. Hall, Colette Boskovic\*,  
Marcus J. Giansiracusa\*

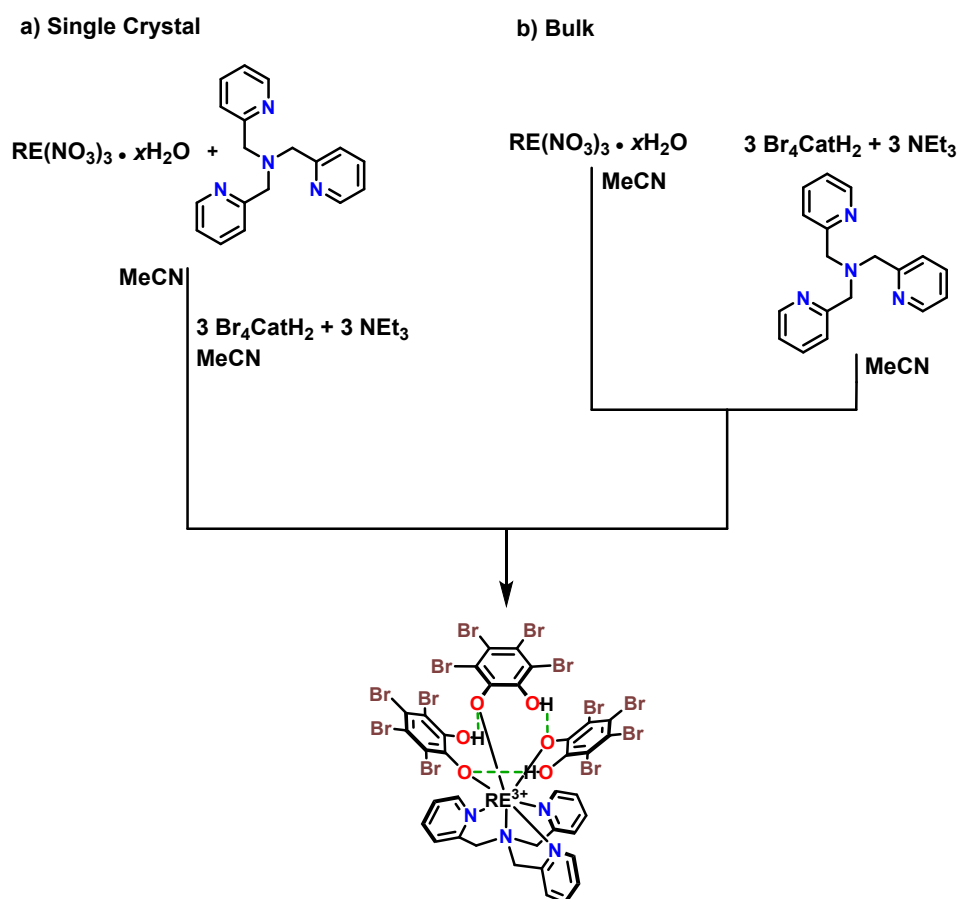

**Scheme S1.** Reaction scheme for [RE(Br<sub>4</sub>catH)<sub>3</sub>(tpa)] (**1-RE**) synthesis for (a) single crystal and (b) bulk samples.

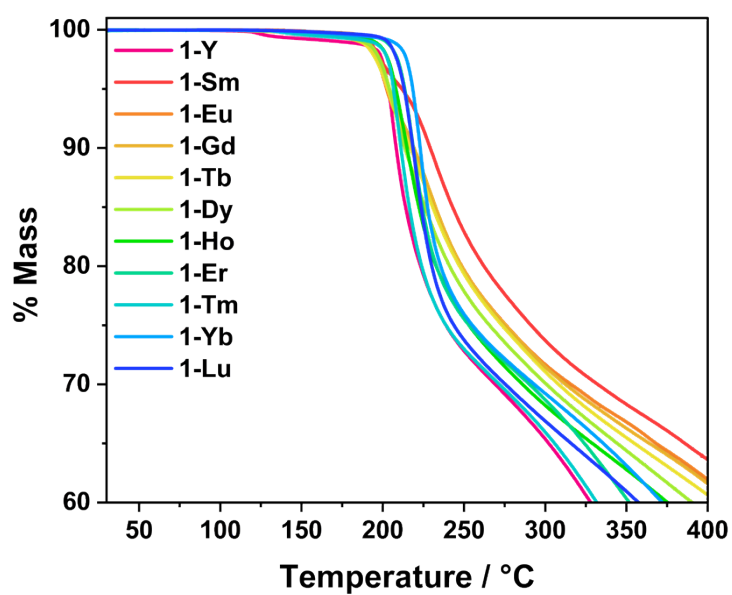

**Figure S1.** Thermogravimetric analysis (TGA) in the range 30-400°C under N<sub>2</sub> flow of **1-RE**·0.5MeCN.

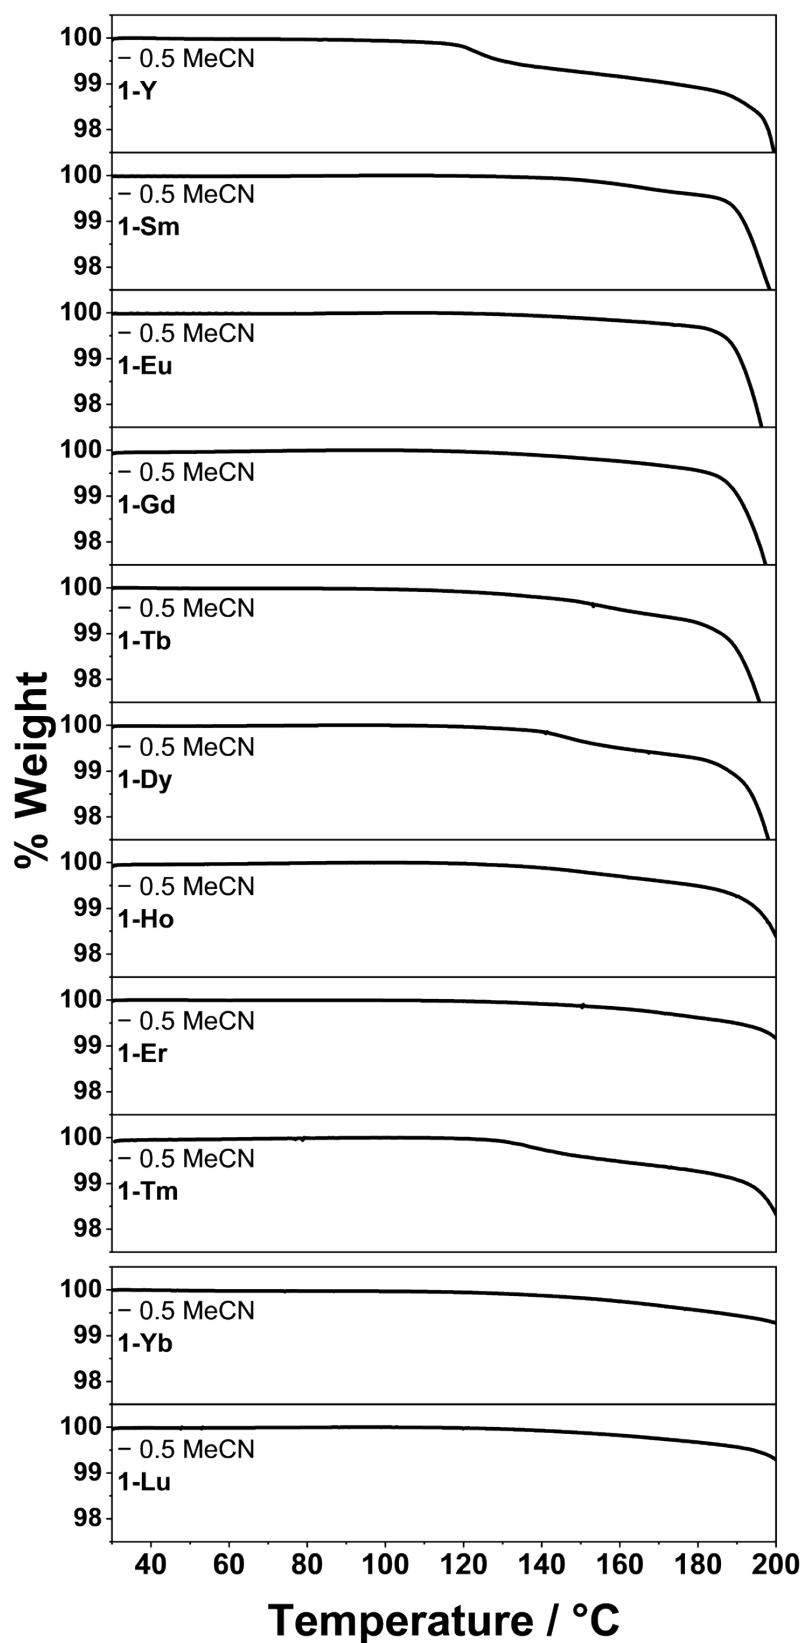

**Figure S2.** Thermogravimetric analysis (TGA) in the range 30-200°C under N<sub>2</sub> flow of 1-RE·0.5MeCN.

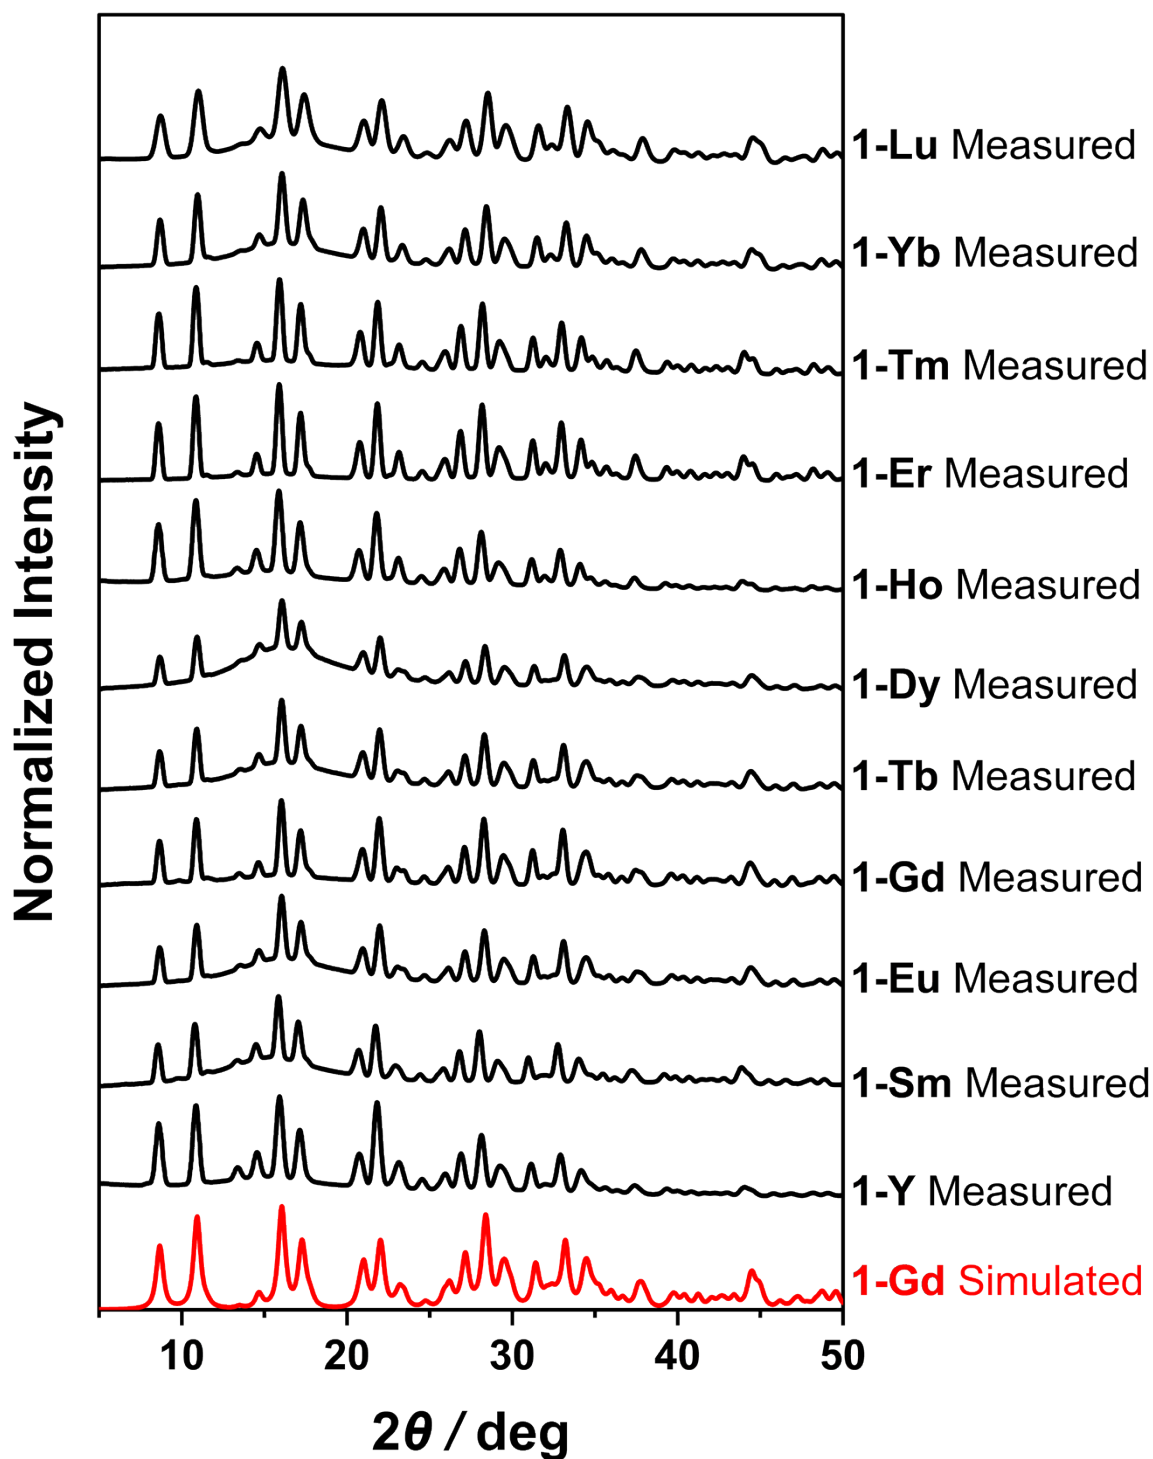

**Figure S3.** Experimental PXRD pattern for 1-RE·0.5MeCN (100 K) vs simulated PXRD from 1-Gd crystal structure (100 K).

**Table S1.** Crystallographic data and structure refinement parameters for compound **1-Y**, **1-Sm**, **1-Eu**, **1-Gd**, **1-Tb**, and **1-Dy**.

|                                                              | <b>1-Y</b>                                                                       | <b>1-Sm</b>                                                                       | <b>1-Eu</b>                                                                       | <b>1-Gd</b>                                                                       | <b>1-Tb</b>                                                                       | <b>1-Dy</b>                                                                       |
|--------------------------------------------------------------|----------------------------------------------------------------------------------|-----------------------------------------------------------------------------------|-----------------------------------------------------------------------------------|-----------------------------------------------------------------------------------|-----------------------------------------------------------------------------------|-----------------------------------------------------------------------------------|
| Empirical formula                                            | C <sub>36</sub> H <sub>21</sub> Br <sub>12</sub> N <sub>4</sub> O <sub>6</sub> Y | C <sub>36</sub> H <sub>21</sub> Br <sub>12</sub> N <sub>4</sub> O <sub>6</sub> Sm | C <sub>36</sub> H <sub>21</sub> Br <sub>12</sub> N <sub>4</sub> O <sub>6</sub> Eu | C <sub>36</sub> H <sub>21</sub> Br <sub>12</sub> N <sub>4</sub> O <sub>6</sub> Gd | C <sub>36</sub> H <sub>21</sub> Br <sub>12</sub> N <sub>4</sub> O <sub>6</sub> Tb | C <sub>36</sub> H <sub>21</sub> Br <sub>12</sub> N <sub>4</sub> O <sub>6</sub> Dy |
| Formula weight                                               | 1653.28                                                                          | 1714.73                                                                           | 1716.34                                                                           | 1721.62                                                                           | 1723.3                                                                            | 1726.87                                                                           |
| Temperature / K                                              | 100                                                                              | 100                                                                               | 100                                                                               | 100                                                                               | 100                                                                               | 100                                                                               |
| Crystal system                                               | trigonal                                                                         | trigonal                                                                          | trigonal                                                                          | trigonal                                                                          | trigonal                                                                          | trigonal                                                                          |
| Space group                                                  | <i>R3c</i>                                                                       | <i>R3c</i>                                                                        | <i>R3c</i>                                                                        | <i>R3c</i>                                                                        | <i>R3c</i>                                                                        | <i>R3c</i>                                                                        |
| <i>a</i> / Å                                                 | 13.1340(2)                                                                       | 13.1753(1)                                                                        | 13.14725(1)                                                                       | 13.1452(1)                                                                        | 13.1128(1)                                                                        | 13.1174(1)                                                                        |
| <i>b</i> / Å                                                 | 13.1340(2)                                                                       | 13.1753(1)                                                                        | 13.14725(1)                                                                       | 13.1452(1)                                                                        | 13.1128(1)                                                                        | 13.1174(1)                                                                        |
| <i>c</i> / Å                                                 | 46.2582(7)                                                                       | 46.6188(4)                                                                        | 46.5427(7)                                                                        | 46.4914(7)                                                                        | 46.3988(7)                                                                        | 46.3156(6)                                                                        |
| $\alpha$ / °                                                 | 90                                                                               | 90                                                                                | 90                                                                                | 90                                                                                | 90                                                                                | 90                                                                                |
| $\beta$ / °                                                  | 90                                                                               | 90                                                                                | 90                                                                                | 90                                                                                | 90                                                                                | 90                                                                                |
| $\gamma$ / °                                                 | 120                                                                              | 120                                                                               | 120                                                                               | 120                                                                               | 120                                                                               | 120                                                                               |
| Volume / Å <sup>3</sup>                                      | 6910.6(2)                                                                        | 7008.30(12)                                                                       | 6967.05(15)                                                                       | 6957.25(15)                                                                       | 6909.21(15)                                                                       | 6901.66(14)                                                                       |
| <i>Z</i>                                                     | 6                                                                                | 6                                                                                 | 6                                                                                 | 6                                                                                 | 6                                                                                 | 6                                                                                 |
| $\rho_{\text{calc}}$ /cm <sup>3</sup>                        | 2.384                                                                            | 2.438                                                                             | 2.454                                                                             | 2.466                                                                             | 2.485                                                                             | 2.493                                                                             |
| $\mu$ /mm <sup>-1</sup>                                      | 14.384                                                                           | 21.863                                                                            | 22.164                                                                            | 21.764                                                                            | 20.153                                                                            | 21.305                                                                            |
| <i>F</i> (000)                                               | 4632                                                                             | 4770                                                                              | 4776                                                                              | 4782                                                                              | 4788                                                                              | 4794                                                                              |
| Crystal size / mm <sup>3</sup>                               | 0.09 × 0.08 × 0.06                                                               | 0.07 × 0.04 × 0.03                                                                | 0.08 × 0.07 × 0.06                                                                | 0.04 × 0.03 × 0.02                                                                | 0.06 × 0.04 × 0.01                                                                | 0.09 × 0.07 × 0.07                                                                |
| Radiation                                                    | Cu K $\alpha$ ( $\lambda$ = 1.54184)                                             | Cu K $\alpha$ ( $\lambda$ = 1.54184)                                              | Cu K $\alpha$ ( $\lambda$ = 1.54184)                                              | Cu K $\alpha$ ( $\lambda$ = 1.54184)                                              | Cu K $\alpha$ ( $\lambda$ = 1.54184)                                              | Cu K $\alpha$ ( $\lambda$ = 1.54184)                                              |
| 2 $\theta$ range for data collection / °                     | 8.67 to 160.836                                                                  | 8.67 to 160.837                                                                   | 8.67 to 160.838                                                                   | 8.67 to 160.839                                                                   | 8.67 to 160.840                                                                   | 8.67 to 160.841                                                                   |
| Index ranges                                                 | -16 ≤ <i>h</i> ≤ 16, -16 ≤ <i>k</i> ≤ 16, -58 ≤ <i>l</i> ≤ 57                    | -16 ≤ <i>h</i> ≤ 16, -16 ≤ <i>k</i> ≤ 16, -59 ≤ <i>l</i> ≤ 48                     | -13 ≤ <i>h</i> ≤ 16, -16 ≤ <i>k</i> ≤ 16, -58 ≤ <i>l</i> ≤ 59                     | -16 ≤ <i>h</i> ≤ 15, -12 ≤ <i>k</i> ≤ 16, -59 ≤ <i>l</i> ≤ 58                     | -16 ≤ <i>h</i> ≤ 14, -16 ≤ <i>k</i> ≤ 16, -58 ≤ <i>l</i> ≤ 58                     | -16 ≤ <i>h</i> ≤ 16, -16 ≤ <i>k</i> ≤ 16, -58 ≤ <i>l</i> ≤ 51                     |
| Reflections collected                                        | 27677                                                                            | 29025                                                                             | 28401                                                                             | 28668                                                                             | 28311                                                                             | 27533                                                                             |
| Independent reflections                                      | 3267 [ <i>R</i> <sub>int</sub> = 0.0642, <i>R</i> <sub>sigma</sub> = 0.0334]     | 3222 [ <i>R</i> <sub>int</sub> = 0.0531, <i>R</i> <sub>sigma</sub> = 0.0289]      | 3339 [ <i>R</i> <sub>int</sub> = 0.0416, <i>R</i> <sub>sigma</sub> = 0.0224]      | 3342 [ <i>R</i> <sub>int</sub> = 0.0473, <i>R</i> <sub>sigma</sub> = 0.0270]      | 3324 [ <i>R</i> <sub>int</sub> = 0.0588, <i>R</i> <sub>sigma</sub> = 0.0306]      | 3084 [ <i>R</i> <sub>int</sub> = 0.0428, <i>R</i> <sub>sigma</sub> = 0.0264]      |
| Data/restraints/parameters                                   | 3267/1/179                                                                       | 3222/1/179                                                                        | 3339/1/179                                                                        | 3342/1/179                                                                        | 3324/1/179                                                                        | 3084/1/179                                                                        |
| Goodness-of-fit on <i>F</i> <sup>2</sup>                     | 1.143                                                                            | 1.124                                                                             | 1.115                                                                             | 1.166                                                                             | 1.165                                                                             | 1.184                                                                             |
| Final <i>R</i> indexes [ <i>I</i> ≥ 2 $\sigma$ ( <i>I</i> )] | <i>R</i> <sub>1</sub> = 0.0361, <i>wR</i> <sub>2</sub> = 0.0941                  | <i>R</i> <sub>1</sub> = 0.0289, <i>wR</i> <sub>2</sub> = 0.0801                   | <i>R</i> <sub>1</sub> = 0.0239, <i>wR</i> <sub>2</sub> = 0.0658                   | <i>R</i> <sub>1</sub> = 0.0336, <i>wR</i> <sub>2</sub> = 0.0995                   | <i>R</i> <sub>1</sub> = 0.0365, <i>wR</i> <sub>2</sub> = 0.1034                   | <i>R</i> <sub>1</sub> = 0.0269, <i>wR</i> <sub>2</sub> = 0.0720                   |
| Final <i>R</i> indexes [all data]                            | <i>R</i> <sub>1</sub> = 0.0376, <i>wR</i> <sub>2</sub> = 0.0951                  | <i>R</i> <sub>1</sub> = 0.0293, <i>wR</i> <sub>2</sub> = 0.0804                   | <i>R</i> <sub>1</sub> = 0.0242, <i>wR</i> <sub>2</sub> = 0.0660                   | <i>R</i> <sub>1</sub> = 0.0339, <i>wR</i> <sub>2</sub> = 0.0998                   | <i>R</i> <sub>1</sub> = 0.0369, <i>wR</i> <sub>2</sub> = 0.1037                   | <i>R</i> <sub>1</sub> = 0.0272, <i>wR</i> <sub>2</sub> = 0.0722                   |
| Largest diff. peak/hole / eÅ <sup>-3</sup>                   | 0.98/-0.77                                                                       | 0.75/-1.23                                                                        | 0.58/-0.65                                                                        | 0.62/-1.01                                                                        | 0.63/-1.24                                                                        | 0.60/-0.63                                                                        |
| Flack parameter                                              | -0.02(3)                                                                         | -0.015(2)                                                                         | -0.0162(14)                                                                       | -0.018(3)                                                                         | -0.013(7)                                                                         | -0.020(2)                                                                         |
| CCDC Number                                                  | 2405954                                                                          | 2405951                                                                           | 2405950                                                                           | 2405956                                                                           | 2405948                                                                           | 2405953                                                                           |

**Table S2.** Crystallographic data and structure refinement parameters for compound **1-Ho**, **1-Er**, **1-Tm**, **1-Yb**, and **1-Lu**.

|                                            | <b>1-Ho</b>                                                                       | <b>1-Er</b>                                                                       | <b>1-Tm</b>                                                                       | <b>1-Yb</b>                                                                       | <b>1-Lu</b>                                                                       |
|--------------------------------------------|-----------------------------------------------------------------------------------|-----------------------------------------------------------------------------------|-----------------------------------------------------------------------------------|-----------------------------------------------------------------------------------|-----------------------------------------------------------------------------------|
| Empirical formula                          | C <sub>36</sub> H <sub>21</sub> Br <sub>12</sub> N <sub>4</sub> O <sub>6</sub> Ho | C <sub>36</sub> H <sub>21</sub> Br <sub>12</sub> N <sub>4</sub> O <sub>6</sub> Er | C <sub>36</sub> H <sub>21</sub> Br <sub>12</sub> N <sub>4</sub> O <sub>6</sub> Tm | C <sub>36</sub> H <sub>21</sub> Br <sub>12</sub> N <sub>4</sub> O <sub>6</sub> Yb | C <sub>36</sub> H <sub>21</sub> Br <sub>12</sub> N <sub>4</sub> O <sub>6</sub> Lu |
| Formula weight                             | 1729.3                                                                            | 1731.63                                                                           | 1733.3                                                                            | 1737.41                                                                           | 1739.34                                                                           |
| Temperature / K                            | 100                                                                               | 100                                                                               | 100                                                                               | 100                                                                               | 100                                                                               |
| Crystal system                             | trigonal                                                                          | trigonal                                                                          | trigonal                                                                          | trigonal                                                                          | trigonal                                                                          |
| Space group                                | <i>R3c</i>                                                                        | <i>R3c</i>                                                                        | <i>R3c</i>                                                                        | <i>R3c</i>                                                                        | <i>R3c</i>                                                                        |
| a / Å                                      | 13.1211(1)                                                                        | 13.1015(2)                                                                        | 13.0916(1)                                                                        | 13.1028(1)                                                                        | 13.0951(1)                                                                        |
| b / Å                                      | 13.1211(1)                                                                        | 13.1015(2)                                                                        | 13.0916(1)                                                                        | 13.1028(1)                                                                        | 13.0951(1)                                                                        |
| c / Å                                      | 46.2179(6)                                                                        | 46.1778(5)                                                                        | 46.0882(5)                                                                        | 45.9960(8)                                                                        | 45.9594(6)                                                                        |
| $\alpha$ / °                               | 90                                                                                | 90                                                                                | 90                                                                                | 90                                                                                | 90                                                                                |
| $\beta$ / °                                | 90                                                                                | 90                                                                                | 90                                                                                | 90                                                                                | 90                                                                                |
| $\gamma$ / °                               | 120                                                                               | 120                                                                               | 120                                                                               | 120                                                                               | 120                                                                               |
| Volume / Å <sup>3</sup>                    | 6890.99(14)                                                                       | 6864.5(2)                                                                         | 6840.78(13)                                                                       | 6838.79(16)                                                                       | 6825.31(14)                                                                       |
| Z                                          | 6                                                                                 | 6                                                                                 | 6                                                                                 | 6                                                                                 | 6                                                                                 |
| $\rho_{\text{calc}}$ /cm <sup>3</sup>      | 2.5                                                                               | 2.513                                                                             | 2.524                                                                             | 2.531                                                                             | 2.539                                                                             |
| $\mu$ /mm <sup>-1</sup>                    | 15.853                                                                            | 16.089                                                                            | 16.372                                                                            | 16.526                                                                            | 16.911                                                                            |
| F(000)                                     | 4800                                                                              | 4806                                                                              | 4812                                                                              | 4818                                                                              | 4824                                                                              |
| Crystal size / mm <sup>3</sup>             | 0.06 × 0.04 × 0.01                                                                | 0.09 × 0.07 × 0.07                                                                | 0.08 × 0.07 × 0.06                                                                | 0.06 × 0.04 × 0.01                                                                | 0.09 × 0.07 × 0.07                                                                |
| Radiation                                  | Cu K $\alpha$ ( $\lambda$ = 1.54184)                                              |
| 2 $\theta$ range for data collection / °   | 8.67 to 160.842                                                                   | 8.67 to 160.843                                                                   | 8.67 to 160.844                                                                   | 8.67 to 160.845                                                                   | 8.67 to 160.846                                                                   |
| Index ranges                               | -15 ≤ h ≤ 16, -16 ≤ k ≤ 16, -58 ≤ l ≤ 58                                          | -16 ≤ h ≤ 16, -16 ≤ k ≤ 16, -51 ≤ l ≤ 58                                          | -16 ≤ h ≤ 16, -16 ≤ k ≤ 16, -58 ≤ l ≤ 56                                          | -16 ≤ h ≤ 11, -16 ≤ k ≤ 16, -58 ≤ l ≤ 57                                          | -15 ≤ h ≤ 16, -16 ≤ k ≤ 16, -56 ≤ l ≤ 58                                          |
| Reflections collected                      | 28061                                                                             | 26953                                                                             | 27886                                                                             | 27280                                                                             | 27160                                                                             |
| Independent reflections                    | 3308 [R <sub>int</sub> = 0.0417, R <sub>sigma</sub> = 0.0259]                     | 3133 [R <sub>int</sub> = 0.0831, R <sub>sigma</sub> = 0.0535]                     | 3227 [R <sub>int</sub> = 0.0735, R <sub>sigma</sub> = 0.0391]                     | 3294 [R <sub>int</sub> = 0.0473, R <sub>sigma</sub> = 0.0250]                     | 3234 [R <sub>int</sub> = 0.0469, R <sub>sigma</sub> = 0.0279]                     |
| Data/restraints/parameters                 | 3308/1/179                                                                        | 3133/7/179                                                                        | 3227/1/179                                                                        | 3294/1/179                                                                        | 3234/1/179                                                                        |
| Goodness-of-fit on F <sup>2</sup>          | 1.164                                                                             | 1.125                                                                             | 1.151                                                                             | 1.193                                                                             | 1.176                                                                             |
| Final R indexes [ $l > 2\sigma$ (I)]       | R <sub>1</sub> = 0.0306, wR <sub>2</sub> = 0.0902                                 | R <sub>1</sub> = 0.0435, wR <sub>2</sub> = 0.1137                                 | R <sub>1</sub> = 0.0384, wR <sub>2</sub> = 0.1041                                 | R <sub>1</sub> = 0.0264, wR <sub>2</sub> = 0.0764                                 | R <sub>1</sub> = 0.0316, wR <sub>2</sub> = 0.0924                                 |
| Final R indexes [all data]                 | R <sub>1</sub> = 0.0308, wR <sub>2</sub> = 0.0903                                 | R <sub>1</sub> = 0.0474, wR <sub>2</sub> = 0.1169                                 | R <sub>1</sub> = 0.0400, wR <sub>2</sub> = 0.1056                                 | R <sub>1</sub> = 0.0265, wR <sub>2</sub> = 0.0765                                 | R <sub>1</sub> = 0.0323, wR <sub>2</sub> = 0.0927                                 |
| Largest diff. peak/hole / eÅ <sup>-3</sup> | 0.62/-1.01                                                                        | 1.49/-1.32                                                                        | 1.13/-1.56                                                                        | 0.70/-1.12                                                                        | 0.99/-1.94                                                                        |
| Flack parameter                            | -0.046(10)                                                                        | -0.02(3)                                                                          | -0.02(2)                                                                          | -0.021(9)                                                                         | -0.01(2)                                                                          |
| CCDC number                                | 2405949                                                                           | 2405955                                                                           | 2405946                                                                           | 2405947                                                                           | 2405952                                                                           |

**Table S3:** Continuous SHAPE Measurements of **1-RE**.

|             | HP-7   | HPY-7  | PBPY-7 | COC-7        | CTPR-7 | JPBPY-7 | JETPY-7 |
|-------------|--------|--------|--------|--------------|--------|---------|---------|
| <b>1-Y</b>  | 34.877 | 20.696 | 8.228  | <b>0.660</b> | 2.374  | 11.931  | 17.173  |
| <b>1-Sm</b> | 34.564 | 20.545 | 8.269  | <b>0.855</b> | 2.53   | 12.004  | 16.873  |
| <b>1-Eu</b> | 34.644 | 20.591 | 8.233  | <b>0.791</b> | 2.471  | 11.962  | 17.036  |
| <b>1-Gd</b> | 34.686 | 20.583 | 8.237  | <b>0.766</b> | 2.456  | 11.964  | 17.146  |
| <b>1-Tb</b> | 34.757 | 20.561 | 8.246  | <b>0.717</b> | 2.424  | 11.955  | 17.338  |
| <b>1-Dy</b> | 34.882 | 20.67  | 8.212  | <b>0.658</b> | 2.372  | 11.933  | 17.422  |
| <b>1-Ho</b> | 34.915 | 20.683 | 8.215  | <b>0.659</b> | 2.376  | 11.945  | 17.486  |
| <b>1-Er</b> | 34.969 | 20.694 | 8.212  | <b>0.605</b> | 2.334  | 11.923  | 17.544  |
| <b>1-Tm</b> | 34.995 | 20.704 | 8.203  | <b>0.590</b> | 2.323  | 11.921  | 17.639  |
| <b>1-Yb</b> | 35.121 | 20.779 | 8.192  | <b>0.561</b> | 2.301  | 11.924  | 17.855  |
| <b>1-Lu</b> | 35.183 | 20.782 | 8.204  | <b>0.539</b> | 2.292  | 11.939  | 17.985  |

Where HP-7 = Heptagon, HPY-7 = Hexagonal pyramid, PBPY-7 = Pentagonal bipyramid, COC-7 = Capped octahedron, CTPR-7 = Capped trigonal prism, JPBPY-7 = Johnson pentagonal bipyramid, JETPY-7 = Elongated triangular pyramid.

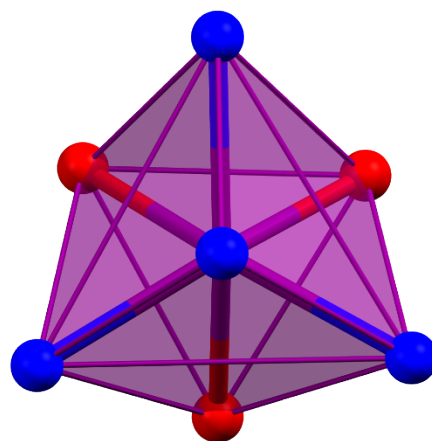**Figure S4.** Coordination geometry of **1-RE** (capped octahedron) viewed along c-axis.

**Table S4.** CSoM values for 1-Dy Complex, all point Groups

| Structure | All Atoms | Coordinated Atoms Only |
|-----------|-----------|------------------------|
| Ci        | 81.869    | 190.616                |
| Cs        | 16.234    | 0.072                  |
| C2        | 42.161    | 53.515                 |
| C2h       | 53.813    | 118.84                 |
| C2v       | 29.301    | 27.439                 |
| C3        | 0         | 0                      |
| C3h       | 39.624    | 82.261                 |
| C3v       | 8.117     | 0.036                  |
| C4        | 27.968    | 27.398                 |
| C4h       | 55.322    | 101.827                |
| C4v       | 23.924    | 21.775                 |
| C5        | 25.415    | 22.33                  |
| C5h       | 53.104    | 96.014                 |
| C5v       | 22.965    | 19.882                 |
| C6        | 29.429    | 32.109                 |
| C7        | 23.737    | 21.225                 |
| C8        | 23.488    | 21.741                 |
| D2        | 59.648    | 101.609                |
| D2d       | 52.839    | 87.087                 |
| D2h       | 54.581    | 101.863                |
| D3        | 35.639    | 82.304                 |
| D3d       | 45.126    | 97.134                 |
| D3h       | 43.844    | 87.279                 |
| D4        | 53.688    | 100.118                |
| D4d       | 48.731    | 89.385                 |
| D4h       | 53.269    | 97.557                 |
| D5        | 51.794    | 96.047                 |
| D5d       | 50.318    | 93.505                 |
| D5h       | 49.875    | 90.993                 |
| Oh        | 53.464    | 102.766                |
| S4        | 57.705    | 101.582                |
| S6        | 49.122    | 111.874                |
| S8        | 55.343    | 100.094                |
| S10       | 60.658    | 118.756                |



**Table S5.** CSoM values for all **1-RE** Complexes, for relevant point groups.

| Structure                | Cs     | C3 | C3v   |
|--------------------------|--------|----|-------|
| <i>Coordinated Atoms</i> |        |    |       |
| 1-Y                      | 0.096  | 0  | 0.048 |
| 1-Sm                     | 0.127  | 0  | 0.063 |
| 1-Eu                     | 0.101  | 0  | 0.051 |
| 1-Gd                     | 0.111  | 0  | 0.055 |
| 1-Tb                     | 0.058  | 0  | 0.029 |
| 1-Dy                     | 0.072  | 0  | 0.036 |
| 1-Ho                     | 0.070  | 0  | 0.035 |
| 1-Er                     | 0.063  | 0  | 0.031 |
| 1-Tm                     | 0.049  | 0  | 0.024 |
| 1-Yb                     | 0.046  | 0  | 0.023 |
| 1-Lu                     | 0.040  | 0  | 0.020 |
| <i>All atoms</i>         |        |    |       |
| 1-Y                      | 16.207 | 0  | 8.104 |
| 1-Sm                     | 16.266 | 0  | 8.133 |
| 1-Eu                     | 16.283 | 0  | 8.142 |
| 1-Gd                     | 16.263 | 0  | 8.132 |
| 1-Tb                     | 16.245 | 0  | 8.123 |
| 1-Dy                     | 16.234 | 0  | 8.117 |
| 1-Ho                     | 16.224 | 0  | 8.112 |
| 1-Er                     | 16.133 | 0  | 8.067 |
| 1-Tm                     | 16.186 | 0  | 8.093 |
| 1-Yb                     | 16.218 | 0  | 8.109 |
| 1-Lu                     | 16.216 | 0  | 8.108 |

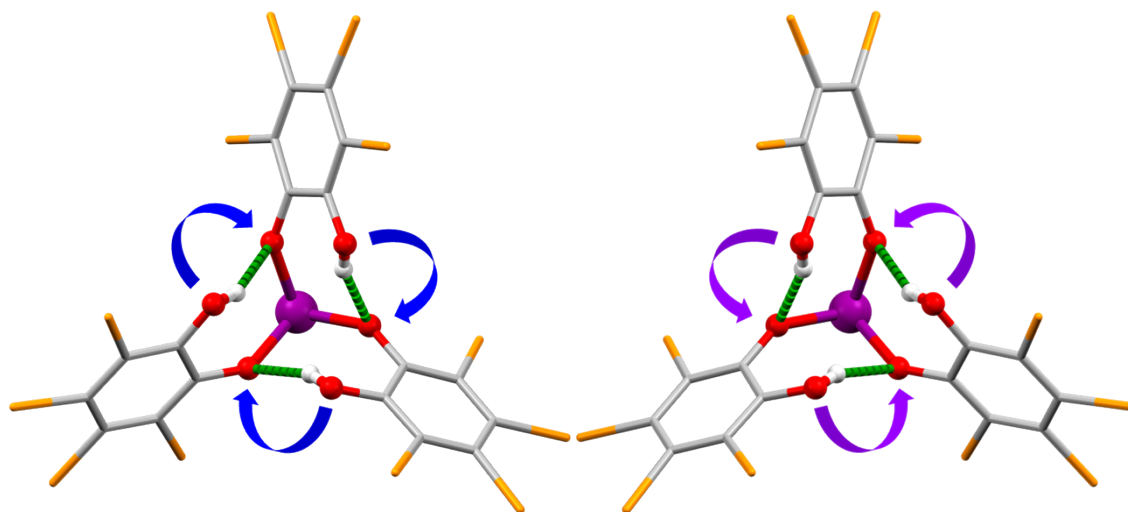

**Figure S5.** Enantiomers of **1-RE** with clockwise hydrogen-bonding (left, blue arrow) and anti-clockwise hydrogen-bonding (right, purple arrow). Tris(2-pyridylmethyl)amine and hydrogens not participating in H-bonding are removed for clarity. Colour code: C (grey), N (blue), O (red), Br (orange), H (white), RE (purple), H-bond (green).

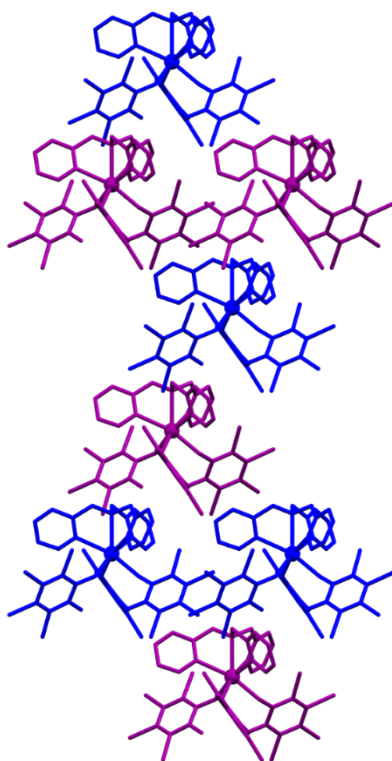

**Figure S6:** Crystal packing of **1-Gd** along *a*-axis. O1(H)⋯O2 H-bonding clockwise in blue and anticlockwise in purple.

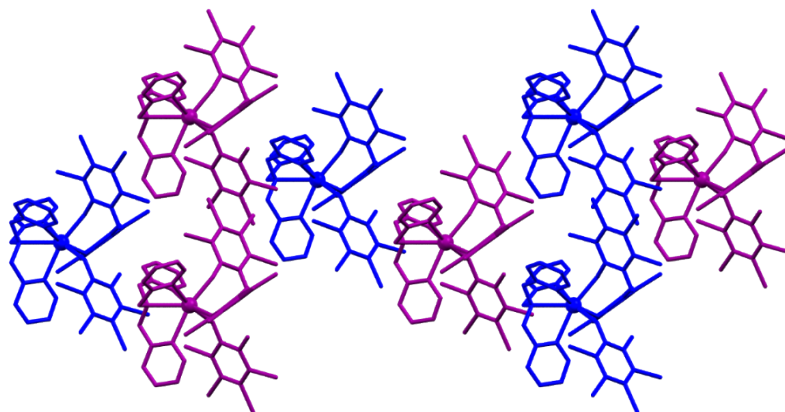

**Figure S7.** Crystal packing of **1-Gd** along *b*-axis. O1(H)⋯O2 H-bonding clockwise in blue and anticlockwise in purple.

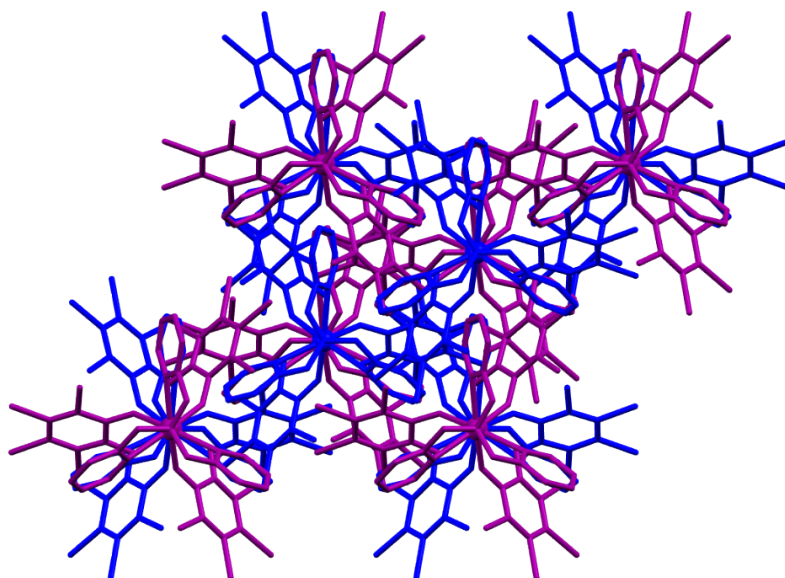

**Figure S8.** Crystal packing of **1-Gd** along *c*-axis. O1(H)⋯O2 H-bonding clockwise in blue and anticlockwise in purple.

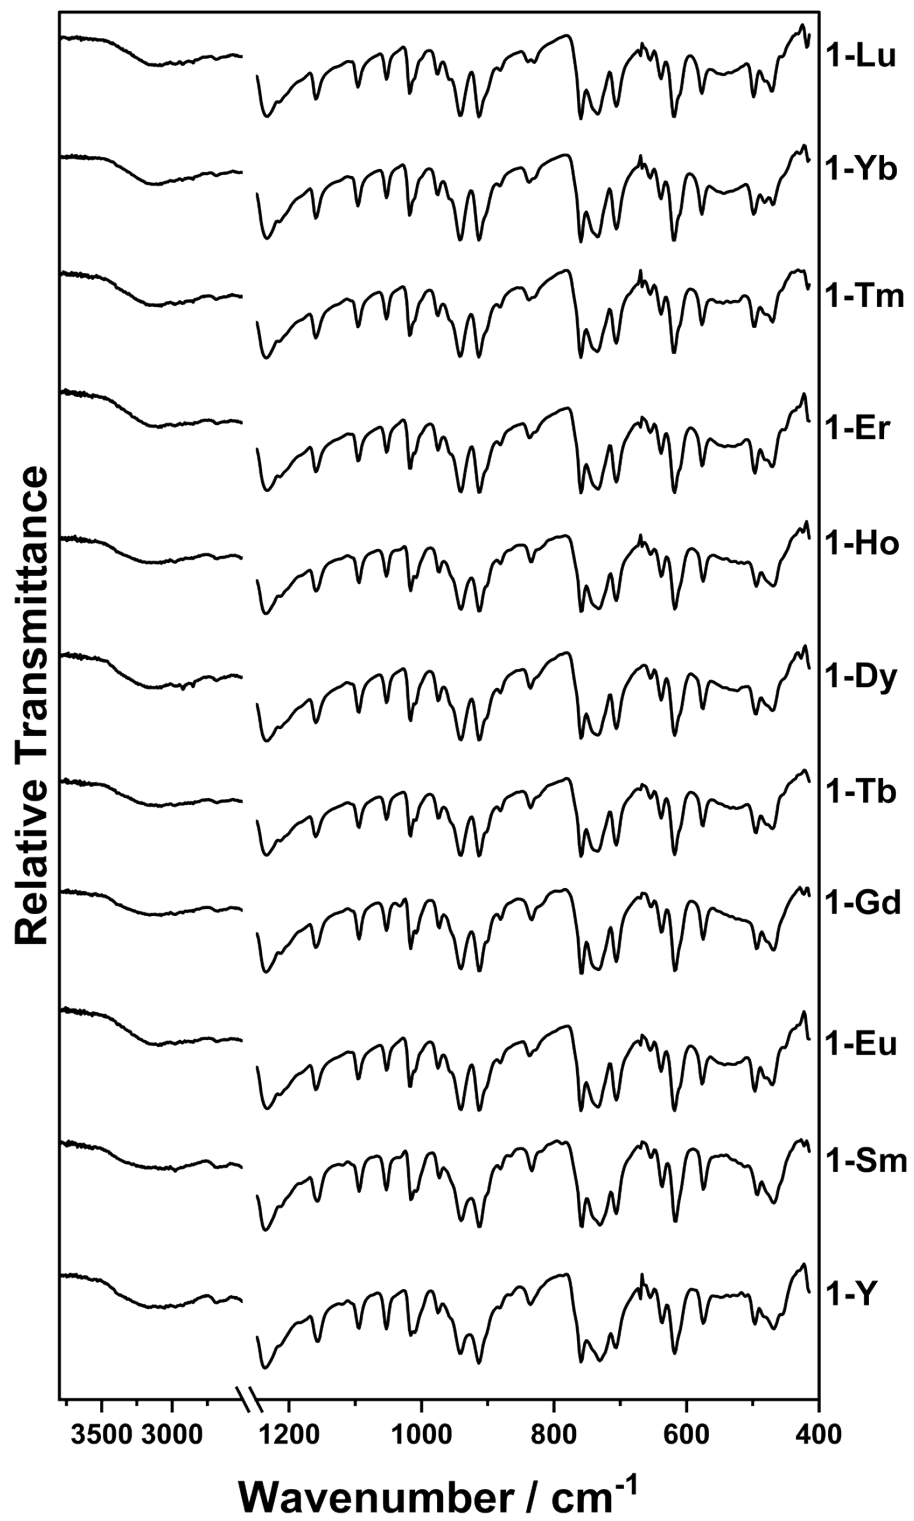

Figure S9. ATR-IR Spectra of 1-RE·0.5MeCN.

**Table S6.** Selected IR (cm<sup>-1</sup>) assignments of **1-RE**·0.5MeCN.

| Moiety and Assignment <sup>a</sup> | 1-Y          | 1-Sm         | 1-Eu         | 1-Gd         | 1-Tb         | 1-Dy         | 1-Ho         | 1-Er         | 1-Tm         | 1-Yb         | 1-Lu         |
|------------------------------------|--------------|--------------|--------------|--------------|--------------|--------------|--------------|--------------|--------------|--------------|--------------|
| cat v(O-H)                         | 3100<br>(b)  |
| tpa v(C=C)                         | 1603<br>(m)  | 1601<br>(m)  | 1603<br>(m)  |
| tpa v(C=N)                         | 1572<br>(w)  | 1573<br>(w)  | 1571<br>(w)  | 1573<br>(w)  | 1573<br>(w)  | 1573<br>(w)  | 1573<br>(w)  | 1573<br>(w)  | 1573<br>(w)  | 1571<br>(w)  | 1573<br>(w)  |
| cat v(C-O) + δ(C-H)                | 1443<br>(s)  | 1443<br>(s)  | 1433<br>(s)  | 1437<br>(s)  | 1435<br>(s)  |
| cat v(C-O) + v(C=C) + δ(C-H)       | 1316<br>(s)  | 1306<br>(s)  | 1311<br>(s)  | 1304<br>(s)  | 1306<br>(s)  | 1306<br>(s)  | 1308<br>(s)  | 1310<br>(s)  | 1314<br>(s)  | 1314<br>(s)  | 1306<br>(s)  |
| cat Skeletal diox                  | 1256<br>(vw) | 1258<br>(vw) | 1261<br>(vw) | 1258<br>(vw) |
| cat v(C-O) + v(C-C)                | 1236<br>(s)  | 1236<br>(s)  | 1234<br>(s)  | 1236<br>(s)  | 1234<br>(s)  | 1234<br>(s)  | 1234<br>(s)  | 1234<br>(s)  | 1232<br>(s)  | 1232<br>(s)  | 1234<br>(s)  |

<sup>a</sup> Catecholate and tpa assignments based on literature DFT.<sup>1</sup>

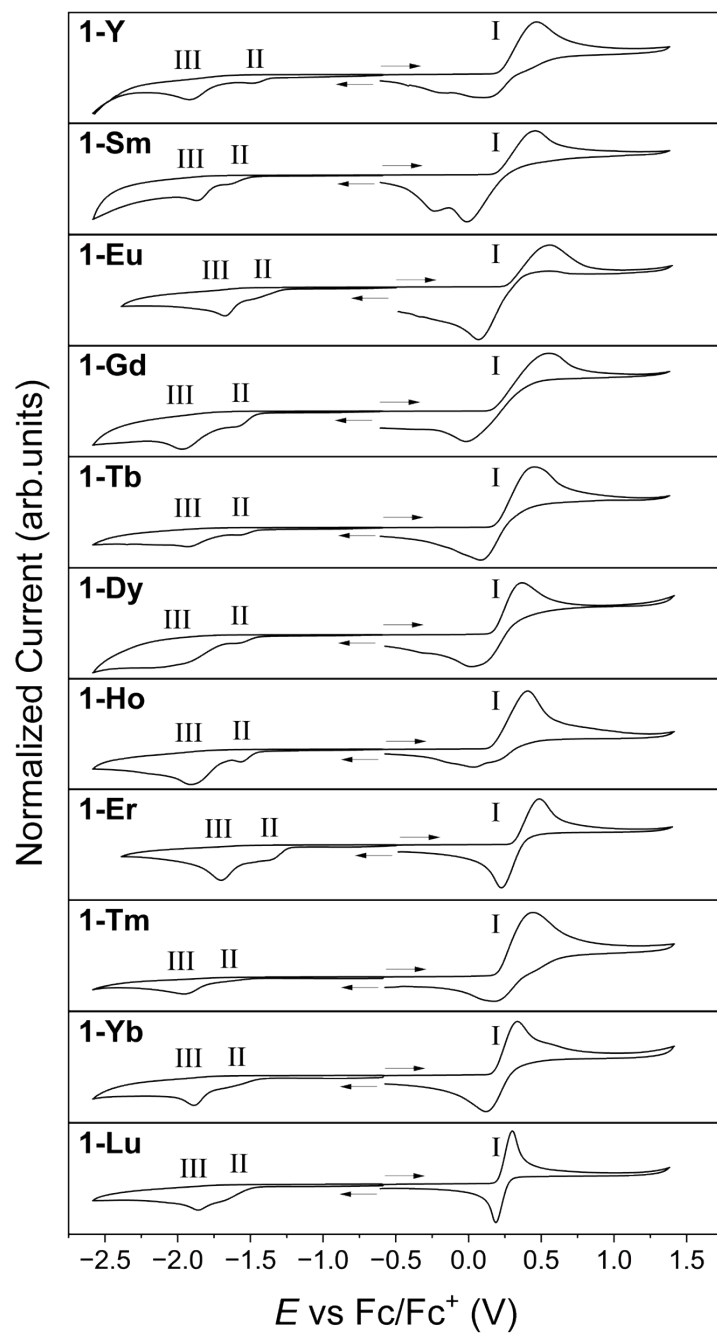

**Figure S10.** Cyclic voltammograms (between  $-2.75$  and  $1.75$  V vs  $\text{Fc}/\text{Fc}^+$ ) of a nafion-coated film of **1-RE** on a glassy carbon electrode in MeCN ( $0.25$  M of TBAPF<sub>6</sub>) at a scan rate of  $250$   $\text{mVs}^{-1}$ . Arrows indicate the starting potential and direction of scan.

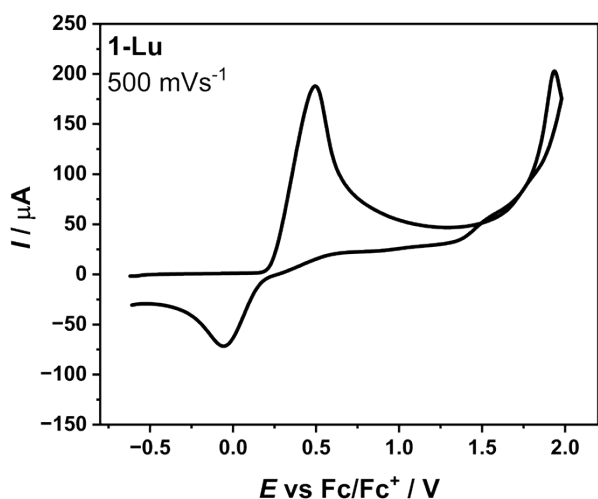

**Figure S11.** Cyclic voltammogram of **1-Lu** to solvent front at  $500 \text{ mV s}^{-1}$ .

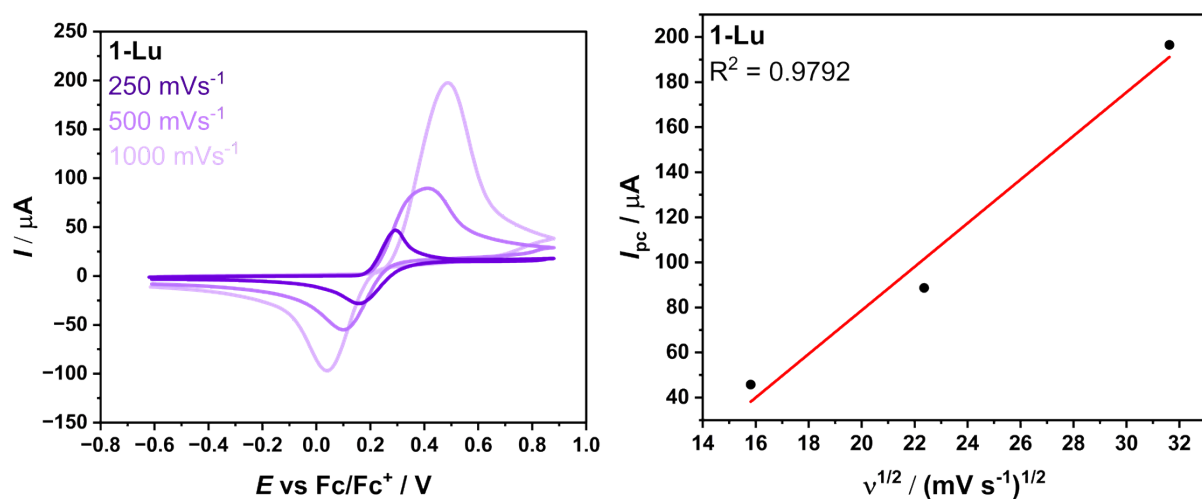

**Figure S12.** Left: Cyclic voltammograms for oxidation I of **1-Lu** at scan rates of 250, 500, and  $1000 \text{ mV s}^{-1}$  (top). Right: Plots of peak cathodic current ( $I_{pc}$ ) vs the square root of scan rate ( $v^{1/2}$ ).

**Table S7.** Expected and measured room temperature  $\chi_M T$  ( $\text{cm}^3 \text{K mol}^{-1}$ )  $M_{\text{mol}}$  ( $N_A \mu_B$ ) values for **1-RE**·0.5MeCN.

| 1-RE | Theoretical $\chi_M T$ ( $\text{cm}^3 \text{K mol}^{-1}$ ) | Measured $\chi_M T$ ( $\text{cm}^3 \text{K mol}^{-1}$ ) | Theoretical $M_{\text{mol}}$ ( $N_A \mu_B$ ) at 2 K and 7 T | Measured $M_{\text{mol}}$ ( $N_A \mu_B$ ) at 2 K and 7 T |
|------|------------------------------------------------------------|---------------------------------------------------------|-------------------------------------------------------------|----------------------------------------------------------|
| 1-Sm | 0.09                                                       | 0.30                                                    | 0.36                                                        | 0.08                                                     |
| 1-Eu | 0                                                          | 1.81                                                    | -                                                           | 0.07                                                     |
| 1-Gd | 7.87                                                       | 8.35                                                    | 7.00                                                        | 6.21                                                     |
| 1-Tb | 11.82                                                      | 11.5                                                    | 4.50                                                        | 4.57                                                     |
| 1-Dy | 14.17                                                      | 13.8                                                    | 5.00                                                        | 5.30                                                     |
| 1-Ho | 14.07                                                      | 13.6                                                    | 5.00                                                        | 6.61                                                     |
| 1-Er | 11.48                                                      | 11.2                                                    | 4.50                                                        | 4.90                                                     |
| 1-Tm | 7.15                                                       | 7.07                                                    | 3.50                                                        | 2.18                                                     |
| 1-Yb | 2.57                                                       | 2.24                                                    | 2.00                                                        | 1.70                                                     |

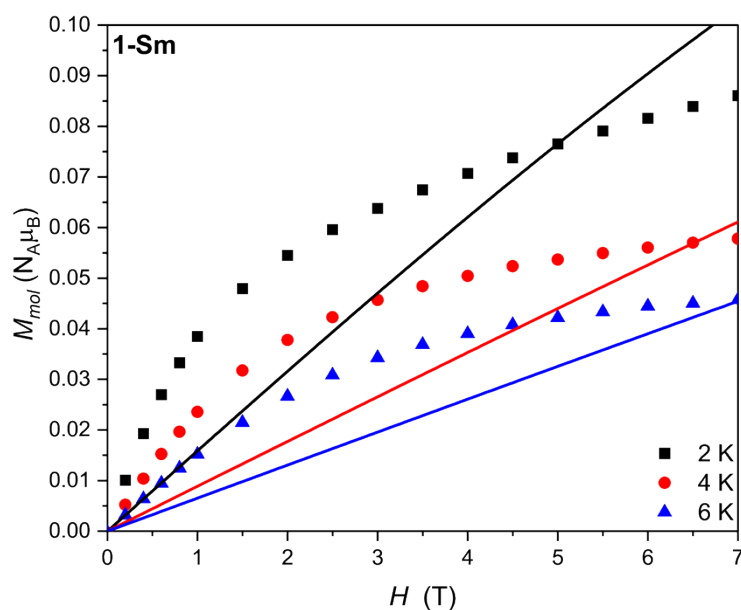

**Figure S14.** Measured magnetization data for **1-Sm**·0.5MeCN at 2 K (black squares), 4 K (red circles), 6 K (blue triangles) with calculated magnetization data at 2 K (solid black line), 4 K (solid red line), and 6 K (solid blue line).



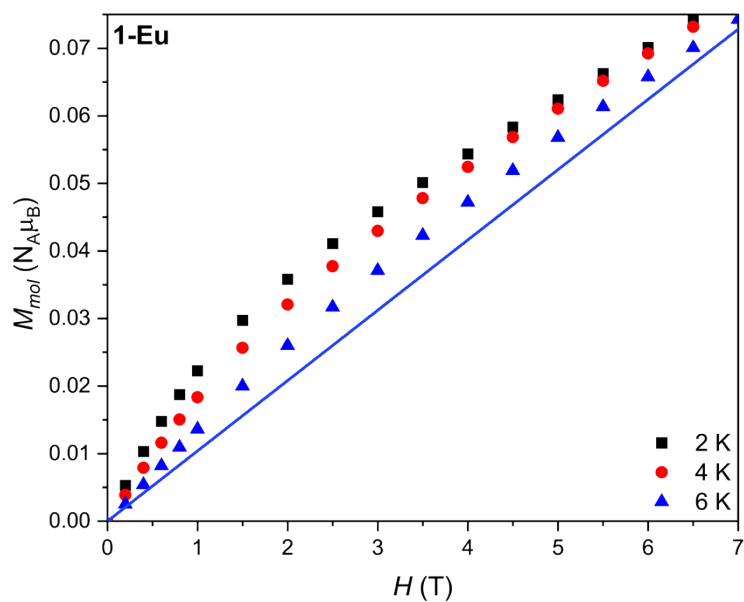

**Figure S15.** Measured magnetization data for **1-Eu**·0.5MeCN at 2 K (black squares), 4 K (red circles), 6 K (blue triangles) with calculated magnetization data at 2 K (solid black line), 4 K (solid red line), and 6 K (solid blue line).

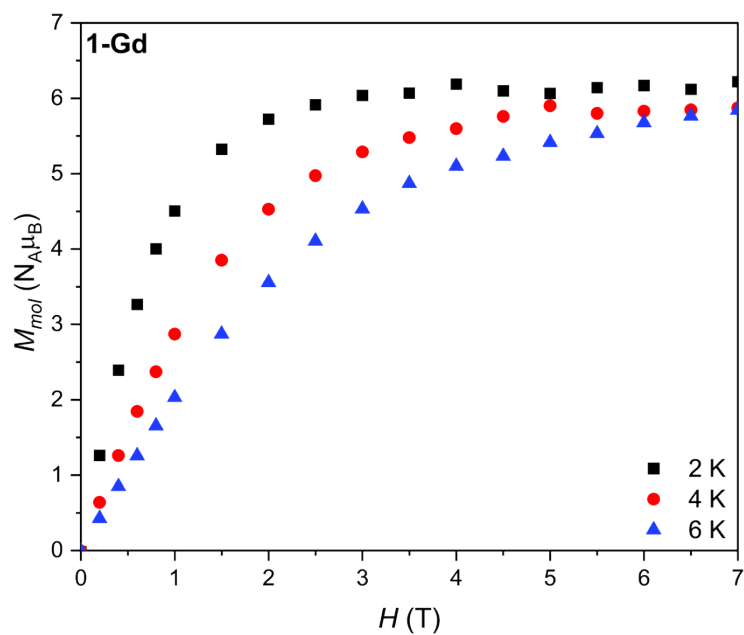

**Figure S16.** Measured magnetization data for **1-Gd**·0.5MeCN at 2 K (black squares), 4 K (red circles), 6 K (blue triangles).

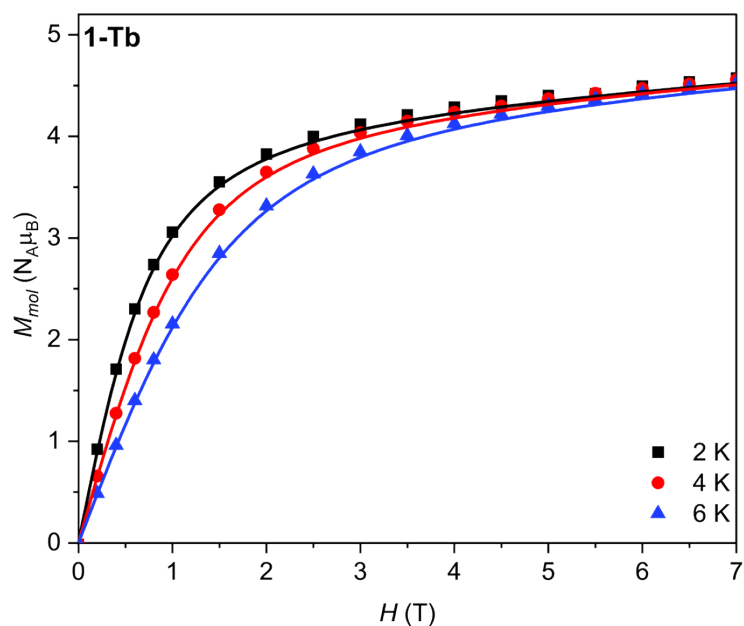

**Figure S17.** Measured magnetization data for **1-Tb**·0.5MeCN at 2 K (black squares), 4 K (red circles), 6 K (blue triangles) with calculated magnetization data at 2 K (solid black line), 4 K (solid red line), and 6 K (solid blue line).

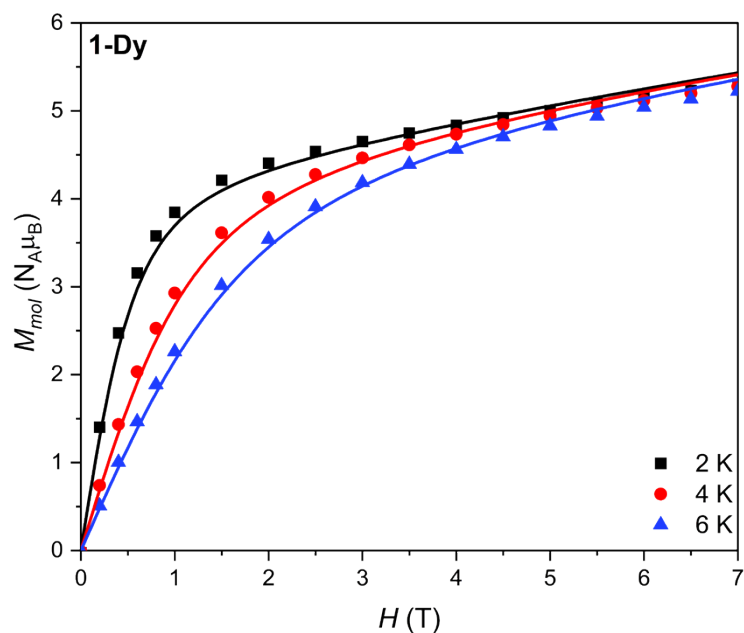

**Figure S18.** Measured magnetization data for **1-Dy**·0.5MeCN at 2 K (black squares), 4 K (red circles), 6 K (blue triangles) with calculated magnetization data at 2 K (solid black line), 4 K (solid red line), and 6 K (solid blue line).

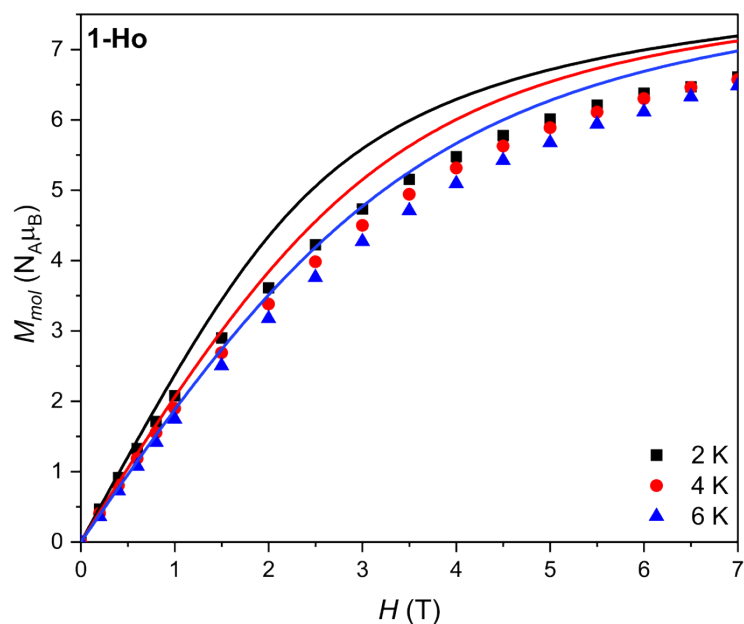

**Figure S19.** Measured magnetization data for **1-Ho**·0.5MeCN at 2 K (black squares), 4 K (red circles), 6 K (blue triangles) with calculated magnetization data at 2 K (solid black line), 4 K (solid red line), and 6 K (solid blue line).

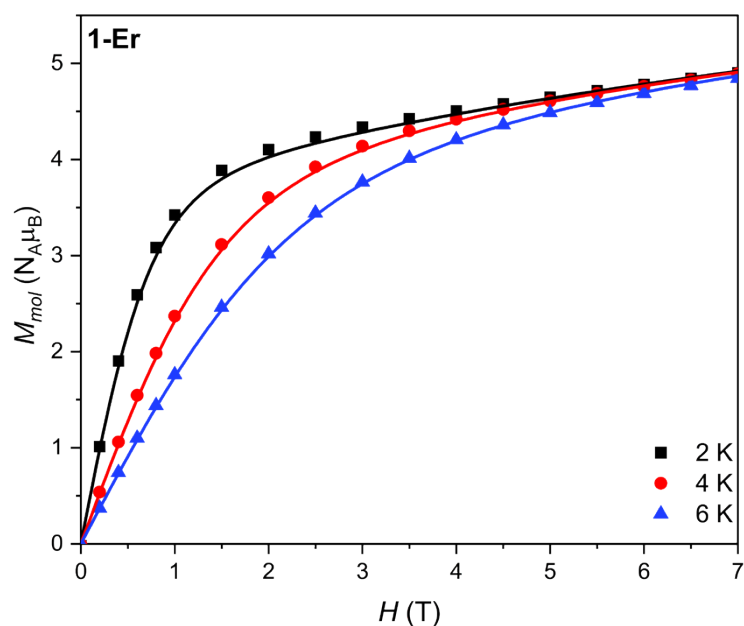

**Figure S20.** Measured magnetization data for **1-Er**·0.5MeCN at 2 K (black squares), 4 K (red circles), 6 K (blue triangles) with calculated magnetization data at 2 K (solid black line), 4 K (solid red line), and 6 K (solid blue line).

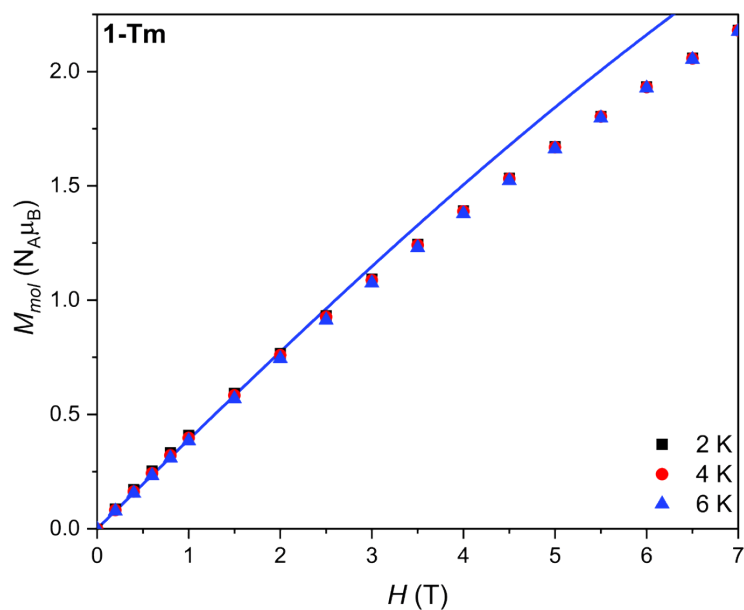

**Figure S21.** Measured magnetization data for **1-Tm**·0.5MeCN at 2 K (black squares), 4 K (red circles), 6 K (blue triangles) with calculated magnetization data at 2 K (solid black line), 4 K (solid red line), and 6 K (solid blue line).

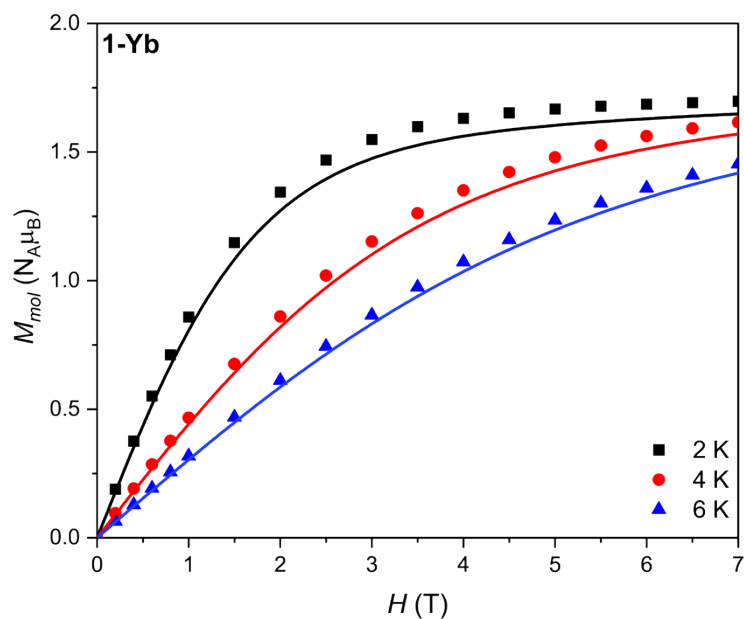

**Figure S22.** Measured magnetization data for **1-Yb**·0.5MeCN at 2 K (black squares), 4 K (red circles), 6 K (blue triangles) with calculated magnetization data at 2 K (solid black line), 4 K (solid red line), and 6 K (solid blue line).

## Dynamic Magnetometry Studies

In phase ( $\chi'$ ) and out-of-phase ( $\chi''$ ) were measured between 0.1-1000 Hz and both were fitted using the generalised Debye model, where  $\chi_T$  is the isothermal susceptibility,  $\chi_S$  adiabatic susceptibility,  $\omega$  the angular frequency of the oscillating field,  $\tau$  the magnetic relaxation times, and  $\alpha$  the distribution parameter.

$$\chi' = (\chi_T - \chi_S) \frac{(2\pi\omega\tau)^{1-\alpha} \cos\left(\frac{\alpha\pi}{2}\right)}{1 + 2\sin\left(\frac{\alpha\pi}{2}\right)(2\pi\omega\tau)^{1-\alpha} + (2\pi\omega\tau)^{2-\alpha}} \quad (\text{Equation S1})$$

$$\chi'' = (\chi_T - \chi_S) \frac{\cos\left(\frac{\pi\alpha}{2}\right)(\omega\tau)^{1-\alpha}}{1 + 2\sin\left(\frac{\pi\alpha}{2}\right)(\omega\tau)^{1-\alpha} + (\omega\tau)^{2-2\alpha}} \quad (\text{Equation S2})$$

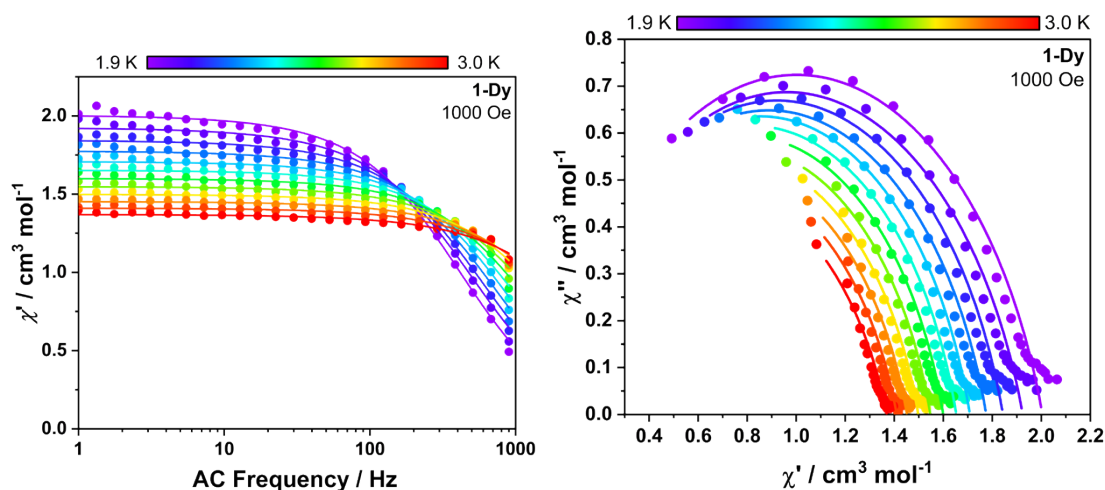

**Figure S23.** Left: Frequency dependence of the out-of-phase molar magnetic susceptibility of **1-Dy**·0.5MeCN in 1000 Oe. Right: Cole-Cole plots of **1-Dy**·0.5MeCN in 1000 Oe.

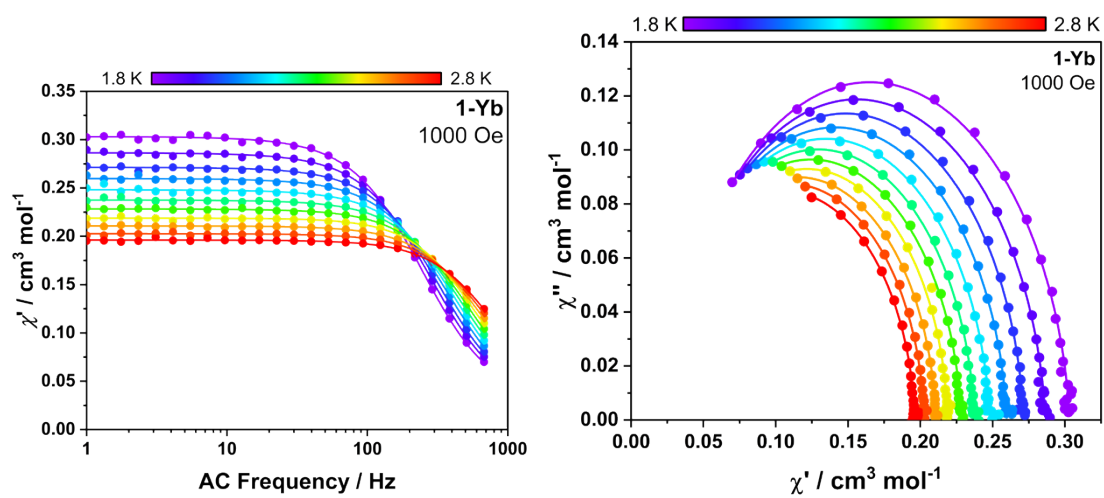

**Figure S24.** Left: Frequency dependence of the out-of-phase molar magnetic susceptibility of **1-Yb**-0.5MeCN in 1000 Oe. Right: Cole-Cole plots of **1-Yb**-0.5MeCN in 1000 Oe.

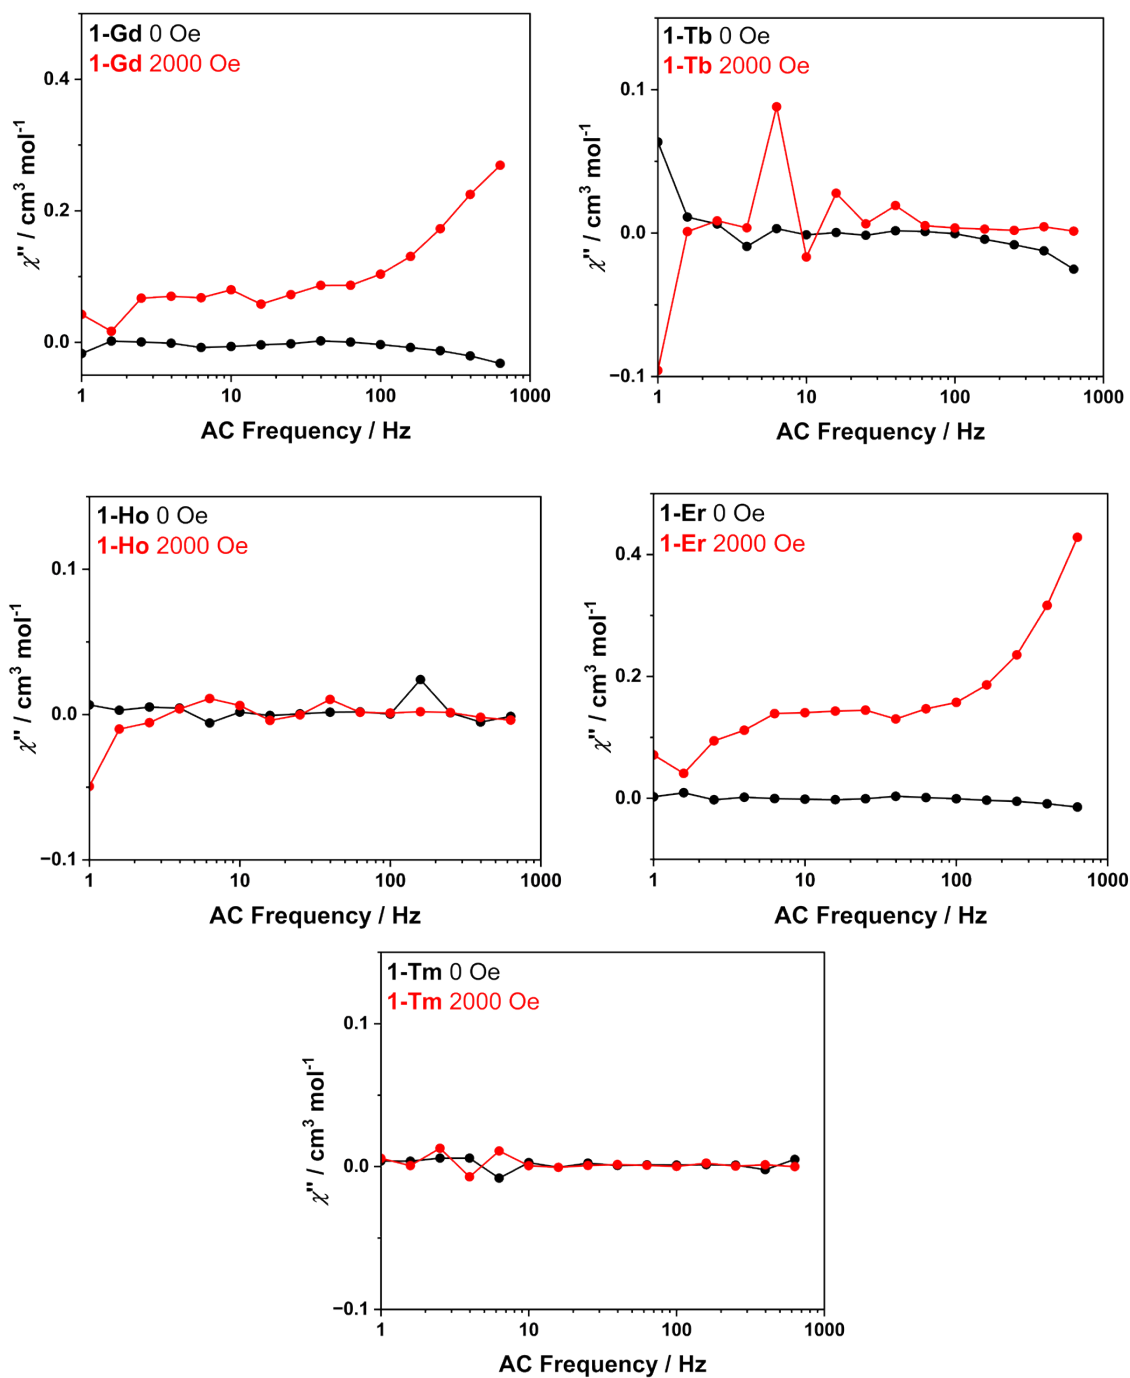

**Figure S25.** Frequency dependence of the out-of-phase molar magnetic susceptibility of 1-RE-0.5MeCN (RE = Gd, Tb, Ho, Er, and Tm) at 0 and 2000 Oe at 2 K.

**Table S8.** Fitted parameters for **1-Dy** at 1000 Oe DC field by the generalised Debye Model.

| $T$ (K) | $\tau$ (s) | $\tau$ Std. Err. | $a$  | $\chi_s$ (cm <sup>3</sup> mol <sup>-1</sup> ) | $\chi_T$ (cm <sup>3</sup> mol <sup>-1</sup> ) |
|---------|------------|------------------|------|-----------------------------------------------|-----------------------------------------------|
| 1.9     | 3.84 E-04  | 1.99 E-05        | 0.20 | 0                                             | 2.00                                          |
| 2.0     | 3.13 E-04  | 2.10 E-05        | 0.21 | 0                                             | 1.92                                          |
| 2.1     | 2.62 E-04  | 2.62 E-05        | 0.20 | 0                                             | 1.84                                          |
| 2.2     | 2.18 E-04  | 1.85 E-05        | 0.20 | 0                                             | 1.78                                          |
| 2.3     | 1.80 E-04  | 1.66 E-05        | 0.19 | 0                                             | 1.71                                          |
| 2.4     | 1.50 E-04  | 1.64 E-05        | 0.19 | 0                                             | 1.65                                          |
| 2.5     | 1.24 E-04  | 1.67 E-05        | 0.19 | 0                                             | 1.60                                          |
| 2.6     | 1.01 E-04  | 1.62 E-05        | 0.19 | 0                                             | 1.55                                          |
| 2.7     | 8.22 E-05  | 1.53 E-05        | 0.20 | 0                                             | 1.50                                          |
| 2.8     | 6.60 E-05  | 1.64 E-05        | 0.20 | 0                                             | 1.50                                          |
| 2.9     | 5.63 E-05  | 1.79 E-05        | 0.21 | 0                                             | 1.41                                          |
| 3.0     | 4.53 E-05  | 1.71 E-05        | 0.23 | 0                                             | 1.37                                          |

**Table S9.** Fitted parameters for **1-Yb·0.5MeCN** at 1000 Oe DC field by the generalised Debye Model.

| $T$ (K) | $\tau$ (s) | $\tau$ Std. Err. | $a$  | $\chi_s$ (cm <sup>3</sup> mol <sup>-1</sup> ) | $\chi_T$ (cm <sup>3</sup> mol <sup>-1</sup> ) |
|---------|------------|------------------|------|-----------------------------------------------|-----------------------------------------------|
| 1.8     | 6.50E-4    | 5.53E-6          | 0.06 | 0.026                                         | 0.30                                          |
| 1.9     | 5.57E-4    | 5.10E-6          | 0.06 | 0.025                                         | 0.29                                          |
| 2.0     | 4.86E-4    | 4.39E-6          | 0.05 | 0.025                                         | 0.27                                          |
| 2.1     | 4.25E-4    | 5.41E-6          | 0.06 | 0.023                                         | 0.26                                          |
| 2.2     | 3.74E-4    | 6.26E-6          | 0.05 | 0.022                                         | 0.25                                          |
| 2.3     | 3.32E-4    | 4.61E-6          | 0.05 | 0.021                                         | 0.24                                          |
| 2.4     | 2.97E-4    | 4.41E-6          | 0.05 | 0.021                                         | 0.23                                          |
| 2.5     | 2.70E-4    | 7.17E-6          | 0.03 | 0.024                                         | 0.22                                          |
| 2.6     | 2.37E-4    | 2.94E-6          | 0.04 | 0.020                                         | 0.21                                          |
| 2.7     | 2.10E-4    | 5.37E-6          | 0.04 | 0.018                                         | 0.20                                          |
| 2.8     | 1.88E-4    | 5.33E-6          | 0.04 | 0.016                                         | 0.20                                          |



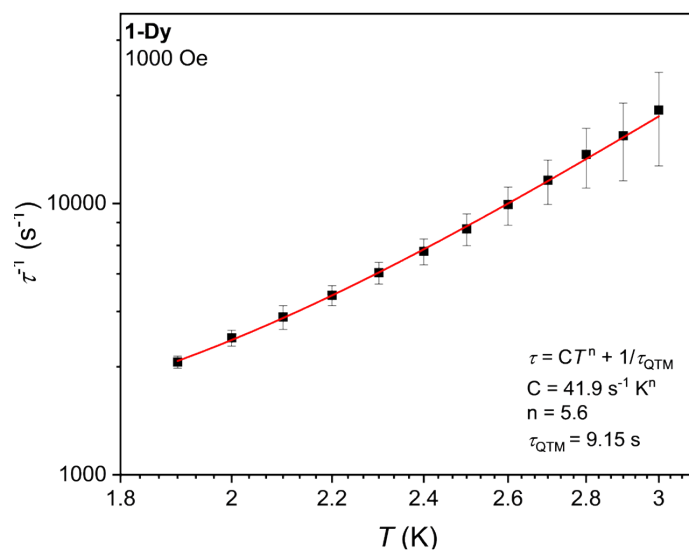

**Figure S26.** Relaxation rates of **1-Dy**-0.5MeCN as determined by AC susceptibility measurement (data points) and QTM and Raman relaxation fit (red line).

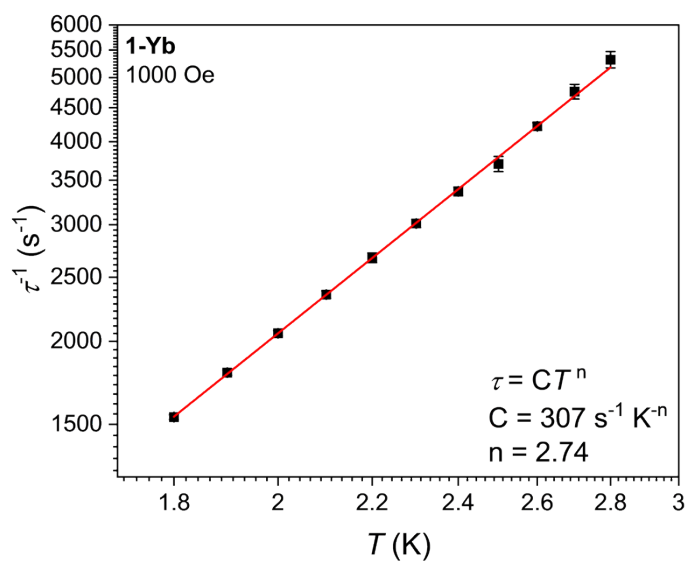

**Figure S27.** Relaxation rates of **1-Yb**-0.5MeCN as determined by AC susceptibility measurement (data points) and Raman relaxation fit (red line) represented as log-log plot.

**Table S10.** Energies ( $\text{cm}^{-1}$ ), percentage composition of the CASSCF/RASSI wavefunctions and the principal  $g$  values of **1-Sm**.

| Energy ( $\text{cm}^{-1}$ ) | $ m_J\rangle$ |                      |       |       |       |      |  |
|-----------------------------|---------------|----------------------|-------|-------|-------|------|--|
|                             | 5/2           | 3/2                  | 1/2   | -1/2  | -3/2  | -5/2 |  |
| 0.00                        | 0.9           | 0.0                  | 49.1  | 49.0  | 0.0   | 0.9  |  |
| 115.3                       | 0.0           | 97.6                 | 0.0   | 0.0   | 2.4   | 0.0  |  |
| 249.9                       | 0.0           | 0.0                  | 1.9   | 0.0   | 0.0   | 98.1 |  |
|                             |               | Principal $g$ values |       |       |       |      |  |
| Energy ( $\text{cm}^{-1}$ ) |               |                      | $g_x$ | $g_y$ | $g_z$ |      |  |
| 0.00                        |               |                      | 0.48  | 0.48  | 0.19  |      |  |
| 115.3                       |               |                      | 0.48  | 0.48  | 0.19  |      |  |
| 249.9                       |               |                      | 0.00  | 0.00  | 1.41  |      |  |

**Table S11.** Energies (cm<sup>-1</sup>), percentage composition of the CASSCF/RASSI wavefunctions and the principal *g* values of **1-Tb**.

| Energy (cm <sup>-1</sup> ) | <i> m<sub>J</sub></i> > |                           |      |      |      |      |      |      |      |      |      |      |                      |
|----------------------------|-------------------------|---------------------------|------|------|------|------|------|------|------|------|------|------|----------------------|
|                            | 6                       | 5                         | 4    | 3    | 2    | 1    | 0    | -1   | -2   | -3   | -4   | -5   | -6                   |
| 0.00                       | 40.8                    | 0.0                       | 0.0  | 7.3  | 0.0  | 0.0  | 3.7  | 0.0  | 0.0  | 7.3  | 0.0  | 0.0  | 40.8                 |
| 4.28                       | 44.2                    | 0.0                       | 0.0  | 5.7  | 0.0  | 0.0  | 0.0  | 0.0  | 0.0  | 5.7  | 0.0  | 0.0  | 44.3                 |
| 101.5                      | 0.0                     | 29.6                      | 1.2  | 0.0  | 16.4 | 2.8  | 0.0  | 2.8  | 16.4 | 0.0  | 1.2  | 29.6 | 0.0                  |
| 101.5                      | 0.0                     | 29.6                      | 1.2  | 0.0  | 16.4 | 2.8  | 0.0  | 2.8  | 16.4 | 0.0  | 1.2  | 29.6 | 0.0                  |
| 151.3                      | 0.0                     | 3.1                       | 26.3 | 0.0  | 0.8  | 19.8 | 0.0  | 19.8 | 0.8  | 0.0  | 26.3 | 3.1  | 0.0                  |
| 151.3                      | 0.0                     | 3.1                       | 26.3 | 0.0  | 0.8  | 19.8 | 0.0  | 19.8 | 0.8  | 0.0  | 26.3 | 3.1  | 0.0                  |
| 194.5                      | 7.7                     | 0.0                       | 0.0  | 15.8 | 0.0  | 0.0  | 53.0 | 0.0  | 0.0  | 15.8 | 0.0  | 0.0  | 7.7                  |
| 319.3                      | 5.7                     | 0.0                       | 0.0  | 44.3 | 0.0  | 0.0  | 0.04 | 0.0  | 0.0  | 44.3 | 0.0  | 0.0  | 5.7                  |
| 395.8                      | 0.0                     | 14.3                      | 6.9  | 0.0  | 22.6 | 6.3  | 0.0  | 6.3  | 22.6 | 0.0  | 6.9  | 14.3 | 0.0                  |
| 395.8                      | 0.0                     | 14.3                      | 6.9  | 0.0  | 22.6 | 6.3  | 0.0  | 6.3  | 22.6 | 0.0  | 6.9  | 14.3 | 0.0                  |
| 452.5                      | 0.0                     | 3.1                       | 15.6 | 0.0  | 10.2 | 21.1 | 0.0  | 21.1 | 10.2 | 0.0  | 15.6 | 3.1  | 0.0                  |
| 452.5                      | 0.0                     | 3.1                       | 15.6 | 0.0  | 10.2 | 21.1 | 0.0  | 21.1 | 10.2 | 0.0  | 15.6 | 3.1  | 0.0                  |
| 463.5                      | 1.4                     | 0.0                       | 0.0  | 27.0 | 0.0  | 0.0  | 43.2 | 0.0  | 0.0  | 27.0 | 0.0  | 0.0  | 1.4                  |
|                            |                         | Principal <i>g</i> values |      |      |      |      |      |      |      |      |      |      |                      |
| Energy (cm <sup>-1</sup> ) | <i>g<sub>x</sub></i>    | <i>g<sub>y</sub></i>      |      |      |      |      |      |      |      |      |      |      | <i>g<sub>z</sub></i> |
| 0.00                       | 0.0                     | 0.0                       |      |      |      |      |      |      |      |      |      |      | 16.51                |
| 4.28                       | 0.0                     | 0.0                       |      |      |      |      |      |      |      |      |      |      | 16.51                |
| 101.5                      | 0.0                     | 0.0                       |      |      |      |      |      |      |      |      |      |      | 10.59                |
| 101.5                      | 0.0                     | 0.0                       |      |      |      |      |      |      |      |      |      |      | 10.59                |
| 151.3                      | 0.0                     | 0.0                       |      |      |      |      |      |      |      |      |      |      | 6.85                 |
| 151.3                      | 0.0                     | 0.0                       |      |      |      |      |      |      |      |      |      |      | 6.85                 |
| 194.5                      | 0.0                     | 0.0                       |      |      |      |      |      |      |      |      |      |      | 0.00                 |
| 319.3                      | 0.0                     | 0.0                       |      |      |      |      |      |      |      |      |      |      | 0.00                 |
| 395.8                      | 0.0                     | 0.0                       |      |      |      |      |      |      |      |      |      |      | 3.87                 |
| 395.8                      | 0.0                     | 0.0                       |      |      |      |      |      |      |      |      |      |      | 3.87                 |
| 452.5                      | 0.0                     | 0.0                       |      |      |      |      |      |      |      |      |      |      | 1.73                 |
| 452.5                      | 0.0                     | 0.0                       |      |      |      |      |      |      |      |      |      |      | 1.73                 |
| 463.5                      | 0.0                     | 0.0                       |      |      |      |      |      |      |      |      |      |      | 0.00                 |

**Table S12.** Energies (cm<sup>-1</sup>), percentage composition of the CASSCF/RASSI wavefunctions and the principal *g* values of **1-Dy**.

| Energy (cm <sup>-1</sup> ) | <i> m<sub>J</sub></i> |       |       |      |                           |      |      |                      |      |      |                      |      |      |       |       |       |
|----------------------------|-----------------------|-------|-------|------|---------------------------|------|------|----------------------|------|------|----------------------|------|------|-------|-------|-------|
|                            | +15/2                 | +13/2 | +11/2 | +9/2 | +7/2                      | +5/2 | +3/2 | +1/2                 | -1/2 | -3/2 | -5/2                 | -7/2 | -9/2 | -11/2 | -13/2 | -15/2 |
| 0.00                       | 0.0                   | 13.0  | 0.9   | 0.0  | 3.2                       | 1.3  | 0.0  | 0.3                  | 1.3  | 0.0  | 0.3                  | 15.5 | 0.0  | 0.2   | 64.1  | 0.0   |
| 56.4                       | 0.0                   | 1.6   | 32.8  | 0.0  | 0.0                       | 11.4 | 0.0  | 0.1                  | 0.1  | 0.0  | 13.6                 | 0.0  | 0.0  | 39.0  | 1.4   | 0.0   |
| 89.4                       | 17.7                  | 0.0   | 0.0   | 33.8 | 0.0                       | 0.0  | 19.0 | 0.0                  | 0.0  | 4.3  | 0.0                  | 0.0  | 16.3 | 0.0   | 0.0   | 8.9   |
| 194.8                      | 0.0                   | 8.2   | 0.8   | 0.0  | 13.3                      | 0.8  | 0.0  | 53.5                 | 11.3 | 0.0  | 3.6                  | 2.8  | 0.0  | 3.9   | 1.7   | 0.0   |
| 231.3                      | 0.0                   | 0.0   | 0.0   | 0.0  | 0.0                       | 0.0  | 1.9  | 0.0                  | 0.0  | 28.2 | 0.0                  | 0.0  | 4.6  | 0.0   | 0.0   | 65.3  |
| 448.4                      | 0.0                   | 3.8   | 0.2   | 0.0  | 24.4                      | 0.6  | 0.0  | 8.1                  | 0.1  | 0.0  | 47.1                 | 0.3  | 0.0  | 15.4  | 0.0   | 0.0   |
| 467.6                      | 0.1                   | 0.0   | 0.0   | 0.7  | 0.0                       | 0.0  | 1.5  | 0.0                  | 0.0  | 45.1 | 0.0                  | 0.0  | 44.6 | 0.0   | 0.0   | 8.0   |
| 571.9                      | 0.0                   | 5.9   | 0.0   | 0.0  | 40.3                      | 0.1  | 0.0  | 24.1                 | 0.1  | 0.0  | 21.3                 | 0.2  | 0.0  | 6.8   | 0.0   | 0.0   |
|                            |                       |       |       |      | Principal <i>g</i> values |      |      |                      |      |      |                      |      |      |       |       |       |
| Energy (cm <sup>-1</sup> ) |                       |       |       |      | <i>g<sub>x</sub></i>      |      |      | <i>g<sub>y</sub></i> |      |      | <i>g<sub>z</sub></i> |      |      |       |       |       |
| 0.00                       |                       |       |       |      | 14.81                     |      |      | 2.51                 |      |      | 2.51                 |      |      |       |       |       |
| 56.4                       |                       |       |       |      | 11.55                     |      |      | 2.11                 |      |      | 2.11                 |      |      |       |       |       |
| 89.4                       |                       |       |       |      | 12.01                     |      |      | 0.00                 |      |      | 0.00                 |      |      |       |       |       |
| 194.8                      |                       |       |       |      | 9.50                      |      |      | 3.10                 |      |      | 9.50                 |      |      |       |       |       |
| 231.3                      |                       |       |       |      | 14.60                     |      |      | 0.00                 |      |      | 0.00                 |      |      |       |       |       |
| 448.4                      |                       |       |       |      | 8.64                      |      |      | 2.38                 |      |      | 8.64                 |      |      |       |       |       |
| 467.6                      |                       |       |       |      | 8.66                      |      |      | 0.00                 |      |      | 0.01                 |      |      |       |       |       |
| 571.9                      |                       |       |       |      | 9.09                      |      |      | 2.70                 |      |      | 9.08                 |      |      |       |       |       |

**Table S13.** Energies (cm<sup>-1</sup>), percentage composition of the CASSCF/RASSI wavefunctions and the principal *g* values of **1-Ho**.

| Energy (cm <sup>-1</sup> ) | <i> m<sub>J</sub></i> > |                           |                      |      |      |      |      |      |      |      |      |      |      |      |      |      |      |
|----------------------------|-------------------------|---------------------------|----------------------|------|------|------|------|------|------|------|------|------|------|------|------|------|------|
|                            | 8                       | 7                         | 6                    | 5    | 4    | 3    | 2    | 1    | 0    | -1   | -2   | -3   | -4   | -5   | -6   | -7   | -8   |
| 0.00                       | 9.5                     | 1.1                       | 0.0                  | 14.1 | 16.0 | 0.0  | 9.1  | 0.2  | 0.0  | 0.2  | 9.1  | 0.0  | 16.0 | 14.1 | 0.0  | 1.1  | 9.5  |
| 0.00                       | 9.5                     | 1.1                       | 0.0                  | 14.4 | 16.0 | 0.0  | 9.1  | 0.2  | 0.0  | 0.2  | 9.1  | 0.0  | 16.0 | 14.1 | 0.0  | 1.1  | 9.5  |
| 12.7                       | 0.0                     | 0.0                       | 7.7                  | 0.0  | 0.0  | 41.9 | 0.0  | 0.0  | 0.7  | 0.0  | 0.0  | 41.9 | 0.0  | 0.0  | 7.7  | 0.0  | 0.0  |
| 17.9                       | 9.2                     | 2.3                       | 0.0                  | 9.8  | 23.6 | 0.0  | 0.1  | 4.9  | 0.0  | 4.9  | 0.1  | 0.0  | 23.6 | 9.8  | 0.0  | 2.3  | 9.2  |
| 17.9                       | 9.2                     | 2.3                       | 0.0                  | 9.9  | 23.6 | 0.0  | 0.1  | 4.9  | 0.0  | 4.9  | 0.1  | 0.0  | 23.6 | 9.9  | 0.0  | 2.3  | 9.2  |
| 80.0                       | 0.0                     | 0.0                       | 18.0                 | 0.0  | 0.0  | 25.4 | 0.0  | 0.0  | 13.2 | 0.0  | 0.0  | 25.3 | 0.0  | 0.0  | 18.0 | 0.0  | 0.0  |
| 104.3                      | 30.8                    | 0.1                       | 0.0                  | 11.5 | 0.3  | 0.0  | 5.2  | 2.1  | 0.0  | 2.1  | 5.2  | 0.0  | 0.3  | 11.5 | 0.0  | 0.1  | 30.8 |
| 104.3                      | 30.8                    | 0.1                       | 0.0                  | 11.5 | 0.3  | 0.0  | 5.2  | 2.1  | 0.0  | 2.1  | 5.2  | 0.0  | 0.3  | 11.5 | 0.0  | 0.1  | 30.8 |
| 259.4                      | 0.0                     | 0.0                       | 42.3                 | 0.0  | 0.0  | 7.7  | 0.0  | 0.0  | 0.0  | 0.0  | 7.7  | 0.0  | 0.0  | 41.3 | 0.0  | 0.0  | 0.0  |
| 277.9                      | 0.3                     | 9.3                       | 0.0                  | 11.6 | 0.1  | 0.0  | 27.9 | 0.7  | 0.0  | 0.7  | 27.9 | 0.0  | 0.13 | 11.6 | 0.0  | 9.3  | 0.3  |
| 277.9                      | 0.3                     | 9.3                       | 0.0                  | 11.6 | 0.1  | 0.0  | 27.9 | 0.7  | 0.0  | 0.7  | 27.9 | 0.0  | 0.13 | 11.6 | 0.0  | 9.3  | 0.3  |
| 299.7                      | 0.0                     | 0.0                       | 30.3                 | 0.0  | 0.0  | 19.4 | 0.0  | 0.0  | 0.5  | 0.0  | 0.0  | 19.4 | 0.0  | 0.0  | 30.3 | 0.0  | 0.0  |
| 323.3                      | 0.1                     | 34.5                      | 0.0                  | 1.9  | 4.6  | 0.0  | 5.1  | 3.9  | 0.0  | 3.9  | 5.1  | 0.0  | 4.6  | 1.9  | 0.0  | 34.5 | 0.1  |
| 323.3                      | 0.1                     | 34.5                      | 0.0                  | 1.9  | 4.6  | 0.0  | 5.1  | 3.9  | 0.0  | 3.9  | 5.1  | 0.0  | 4.6  | 1.9  | 0.0  | 34.5 | 0.1  |
| 350.2                      | 0.0                     | 2.7                       | 0.0                  | 1.0  | 5.4  | 0.0  | 2.6  | 38.1 | 0.0  | 38.1 | 2.6  | 0.0  | 5.4  | 1.0  | 0.0  | 2.7  | 0.0  |
| 350.2                      | 0.0                     | 2.7                       | 0.0                  | 1.0  | 5.4  | 0.0  | 2.6  | 38.1 | 0.0  | 38.1 | 2.6  | 0.0  | 5.4  | 1.0  | 0.0  | 2.7  | 0.0  |
| 379.4                      | 0.0                     | 0.0                       | 1.6                  | 0.0  | 0.0  | 5.6  | 0.0  | 0.0  | 85.5 | 0.0  | 0.0  | 5.6  | 0.0  | 0.0  | 1.6  | 0.0  | 0.0  |
|                            |                         | Principal <i>g</i> values |                      |      |      |      |      |      |      |      |      |      |      |      |      |      |      |
| Energy (cm <sup>-1</sup> ) | <i>g<sub>x</sub></i>    | <i>g<sub>y</sub></i>      | <i>g<sub>z</sub></i> |      |      |      |      |      |      |      |      |      |      |      |      |      |      |
| 0.00                       | 0.00                    | 0.00                      | 4.64                 |      |      |      |      |      |      |      |      |      |      |      |      |      |      |
| 0.00                       | 0.00                    | 0.00                      | 4.64                 |      |      |      |      |      |      |      |      |      |      |      |      |      |      |
| 12.7                       | 0.00                    | 0.00                      | 0.00                 |      |      |      |      |      |      |      |      |      |      |      |      |      |      |
| 17.9                       | 0.00                    | 0.00                      | 0.40                 |      |      |      |      |      |      |      |      |      |      |      |      |      |      |
| 17.9                       | 0.00                    | 0.00                      | 0.40                 |      |      |      |      |      |      |      |      |      |      |      |      |      |      |
| 80.0                       | 0.00                    | 0.00                      | 0.00                 |      |      |      |      |      |      |      |      |      |      |      |      |      |      |
| 104.3                      | 0.00                    | 0.00                      | 15.39                |      |      |      |      |      |      |      |      |      |      |      |      |      |      |
| 104.3                      | 0.00                    | 0.00                      | 15.39                |      |      |      |      |      |      |      |      |      |      |      |      |      |      |
| 259.4                      | 0.00                    | 0.00                      | 0.00                 |      |      |      |      |      |      |      |      |      |      |      |      |      |      |
| 277.9                      | 0.00                    | 0.00                      | 2.46                 |      |      |      |      |      |      |      |      |      |      |      |      |      |      |
| 277.9                      | 0.00                    | 0.00                      | 2.46                 |      |      |      |      |      |      |      |      |      |      |      |      |      |      |
| 299.7                      | 0.00                    | 0.00                      | 0.00                 |      |      |      |      |      |      |      |      |      |      |      |      |      |      |
| 323.3                      | 0.00                    | 0.00                      | 12.04                |      |      |      |      |      |      |      |      |      |      |      |      |      |      |
| 323.3                      | 0.00                    | 0.00                      | 12.04                |      |      |      |      |      |      |      |      |      |      |      |      |      |      |
| 350.2                      | 0.00                    | 0.00                      | 3.31                 |      |      |      |      |      |      |      |      |      |      |      |      |      |      |
| 350.2                      | 0.00                    | 0.00                      | 3.31                 |      |      |      |      |      |      |      |      |      |      |      |      |      |      |
| 379.4                      | 0.00                    | 0.00                      | 0.00                 |      |      |      |      |      |      |      |      |      |      |      |      |      |      |

**Table S14.** Energies (cm<sup>-1</sup>), percentage composition of the CASSCF/RASSI wavefunctions and the principal *g* values of **1-Er**.

| Energy (cm <sup>-1</sup> ) | $ m_J\rangle$ |       |       |      |      |      |      |                                  |      |      |                      |      |      |                      |       |       |
|----------------------------|---------------|-------|-------|------|------|------|------|----------------------------------|------|------|----------------------|------|------|----------------------|-------|-------|
|                            | +15/2         | +13/2 | +11/2 | +9/2 | +7/2 | +5/2 | +3/2 | +1/2                             | -1/2 | -3/2 | -5/2                 | -7/2 | -9/2 | -11/2                | -13/2 | -15/2 |
| 0.0                        | 0.0           | 0.5   | 0.7   | 0.0  | 3.3  | 4.4  | 0.0  | 25.0                             | 55.3 | 0.0  | 2.0                  | 7.4  | 0.0  | 0.3                  | 1.1   | 0.0   |
| 0.0                        | 0.0           | 1.1   | 0.3   | 0.0  | 7.4  | 2.0  | 0.0  | 55.3                             | 25.0 | 0.0  | 4.4                  | 3.3  | 0.0  | 0.7                  | 0.5   | 0.0   |
| 45.3                       | 0.0           | 39.5  | 2.4   | 0.0  | 4.6  | 2.0  | 0.0  | 1.4                              | 1.4  | 0.0  | 2.0                  | 4.6  | 0.0  | 2.4                  | 39.5  | 0.0   |
| 45.3                       | 0.0           | 39.5  | 2.4   | 0.0  | 4.6  | 2.0  | 0.0  | 1.4                              | 1.4  | 0.0  | 2.0                  | 4.6  | 0.0  | 2.4                  | 39.5  | 0.0   |
| 54.3                       | 0.6           | 0.0   | 0.0   | 18.8 | 0.0  | 0.0  | 33.0 | 0.0                              | 0.0  | 41.6 | 0.0                  | 0.0  | 6.1  | 0.0                  | 0.0   | 0.0   |
| 54.3                       | 0.0           | 0.0   | 0.0   | 6.1  | 0.0  | 0.0  | 41.6 | 0.0                              | 0.0  | 33.0 | 0.0                  | 0.0  | 18.8 | 0.0                  | 0.0   | 0.6   |
| 90.3                       | 0.0           | 10.4  | 1.6   | 0.0  | 0.0  | 0.9  | 0.0  | 0.6                              | 0.0  | 0.0  | 29.9                 | 0.0  | 0.0  | 56.3                 | 0.3   | 0.0   |
| 90.3                       | 0.0           | 0.3   | 56.3  | 0.0  | 0.0  | 29.9 | 0.0  | 0.0                              | 0.6  | 0.0  | 0.9                  | 0.0  | 0.0  | 1.6                  | 10.4  | 0.0   |
| 278.5                      | 0.0           | 0.0   | 0.0   | 0.2  | 0.0  | 0.0  | 2.2  | 0.0                              | 0.0  | 6.7  | 0.0                  | 0.0  | 16.6 | 0.0                  | 0.0   | 74.4  |
| 278.5                      | 74.4          | 0.0   | 0.0   | 16.6 | 0.0  | 0.0  | 6.7  | 0.0                              | 0.0  | 2.2  | 0.0                  | 0.0  | 0.2  | 0.0                  | 0.0   | 0.0   |
| 331.5                      | 0.0           | 2.6   | 5.5   | 0.0  | 12.0 | 6.4  | 0.0  | 11.1                             | 2.3  | 0.0  | 30.8                 | 2.5  | 0.0  | 26.4                 | 0.5   | 0.0   |
| 331.5                      | 0.0           | 0.5   | 26.4  | 0.0  | 2.5  | 30.8 | 0.0  | 2.3                              | 11.1 | 0.0  | 6.4                  | 12.0 | 0.0  | 5.5                  | 2.6   | 0.0   |
| 399.5                      | 0.0           | 3.2   | 1.9   | 0.0  | 37.2 | 9.4  | 0.0  | 1.6                              | 1.2  | 0.0  | 12.3                 | 28.4 | 0.0  | 2.4                  | 2.4   | 0.0   |
| 399.5                      | 0.0           | 2.4   | 2.4   | 0.0  | 28.4 | 12.3 | 0.0  | 1.2                              | 1.6  | 0.0  | 9.4                  | 37.2 | 0.0  | 1.9                  | 3.2   | 0.0   |
| 399.6                      | 24.0          | 0.0   | 0.0   | 54.0 | 0.0  | 0.0  | 15.7 | 0.0                              | 0.0  | 0.9  | 0.0                  | 0.0  | 4.4  | 0.0                  | 0.0   | 1.1   |
| 399.6                      | 1.1           | 0.0   | 0.0   | 4.4  | 0.0  | 0.0  | 0.9  | 0.0                              | 0.0  | 15.7 | 0.0                  | 0.0  | 54.0 | 0.0                  | 0.0   | 24.0  |
|                            |               |       |       |      |      |      |      | <b>Principal <i>g</i> values</b> |      |      |                      |      |      |                      |       |       |
| Energy (cm <sup>-1</sup> ) |               |       |       |      |      |      |      | <i>g<sub>x</sub></i>             |      |      | <i>g<sub>y</sub></i> |      |      | <i>g<sub>z</sub></i> |       |       |
| 0.0                        |               |       |       |      |      |      |      | 9.17                             |      |      | 9.17                 |      |      | 1.62                 |       |       |
| 45.3                       |               |       |       |      |      |      |      | 3.56                             |      |      | 3.56                 |      |      | 12.2                 |       |       |
| 54.3                       |               |       |       |      |      |      |      | 0.00                             |      |      | 0.00                 |      |      | 4.72                 |       |       |
| 90.3                       |               |       |       |      |      |      |      | 2.94                             |      |      | 2.94                 |      |      | 7.77                 |       |       |
| 278.5                      |               |       |       |      |      |      |      | 0.00                             |      |      | 0.00                 |      |      | 15.24                |       |       |
| 331.5                      |               |       |       |      |      |      |      | 6.63                             |      |      | 6.63                 |      |      | 4.56                 |       |       |
| 399.5                      |               |       |       |      |      |      |      | 7.41                             |      |      | 6.90                 |      |      | 4.52                 |       |       |
| 399.6                      |               |       |       |      |      |      |      | 0.15                             |      |      | 0.25                 |      |      | 11.10                |       |       |

**Table S15.** Energies (cm<sup>-1</sup>), percentage composition of the CASSCF/RASSI wavefunctions and the principal *g* values of **1-Tm**.

| Energy (cm <sup>-1</sup> ) | $ m_J\rangle$        |                           |                      |      |      |      |      |      |      |      |      |      |      |
|----------------------------|----------------------|---------------------------|----------------------|------|------|------|------|------|------|------|------|------|------|
|                            | 6                    | 5                         | 4                    | 3    | 2    | 1    | 0    | -1   | -2   | -3   | -4   | -5   | -6   |
| 0.00                       | 7.2                  | 0.0                       | 0.0                  | 32.2 | 0.0  | 0.0  | 21.1 | 0.0  | 0.0  | 32.2 | 0.0  | 0.0  | 7.2  |
| 34.4                       | 9.3                  | 0.0                       | 0.0                  | 36.1 | 0.0  | 0.0  | 9.2  | 0.0  | 0.0  | 36.1 | 0.0  | 0.0  | 9.3  |
| 40.8                       | 0.0                  | 6.4                       | 1.8                  | 0.0  | 33.7 | 8.1  | 0.0  | 8.1  | 33.7 | 0.0  | 1.8  | 6.4  | 0.0  |
| 40.8                       | 0.0                  | 6.4                       | 1.8                  | 0.0  | 33.7 | 8.1  | 0.0  | 8.1  | 33.7 | 0.0  | 1.8  | 6.4  | 0.0  |
| 78.2                       | 0.0                  | 0.9                       | 17.5                 | 0.0  | 7.3  | 24.2 | 0.0  | 24.2 | 7.3  | 0.0  | 17.5 | 0.9  | 0.0  |
| 78.2                       | 0.0                  | 0.9                       | 17.5                 | 0.0  | 7.3  | 24.2 | 0.0  | 24.2 | 7.3  | 0.0  | 17.5 | 0.9  | 0.0  |
| 263.9                      | 14.8                 | 0.0                       | 0.0                  | 4.5  | 0.0  | 0.0  | 61.4 | 0.0  | 0.0  | 4.5  | 0.0  | 0.0  | 14.8 |
| 346.4                      | 41.0                 | 0.0                       | 0.0                  | 8.8  | 0.0  | 0.0  | 0.4  | 0.0  | 0.0  | 8.8  | 0.0  | 0.0  | 41.0 |
| 348.8                      | 0.0                  | 0.3                       | 30.5                 | 0.0  | 1.6  | 17.6 | 0.0  | 17.6 | 1.6  | 0.0  | 30.5 | 0.3  | 0.0  |
| 348.8                      | 0.0                  | 0.3                       | 30.5                 | 0.0  | 1.6  | 17.6 | 0.0  | 17.6 | 1.6  | 0.0  | 30.5 | 0.3  | 0.0  |
| 380.6                      | 27.6                 | 0.0                       | 0.0                  | 18.5 | 0.0  | 0.0  | 7.8  | 0.0  | 0.0  | 18.5 | 0.0  | 0.0  | 27.6 |
| 468.7                      | 0.0                  | 42.3                      | 0.1                  | 0.0  | 7.4  | 0.2  | 0.0  | 0.2  | 7.4  | 0.0  | 0.1  | 42.3 | 0.0  |
| 468.7                      | 0.0                  | 42.3                      | 0.1                  | 0.0  | 7.4  | 0.2  | 0.0  | 0.2  | 7.4  | 0.0  | 0.1  | 42.3 | 0.0  |
|                            |                      | Principal <i>g</i> values |                      |      |      |      |      |      |      |      |      |      |      |
| Energy (cm <sup>-1</sup> ) | <i>g<sub>x</sub></i> | <i>g<sub>y</sub></i>      | <i>g<sub>z</sub></i> |      |      |      |      |      |      |      |      |      |      |
| 0.00                       | 0.0                  | 0.0                       | 6.96                 |      |      |      |      |      |      |      |      |      |      |
| 34.4                       | 0.0                  | 0.0                       | 6.96                 |      |      |      |      |      |      |      |      |      |      |
| 40.8                       | 0.0                  | 0.0                       | 3.90                 |      |      |      |      |      |      |      |      |      |      |
| 40.8                       | 0.0                  | 0.0                       | 3.90                 |      |      |      |      |      |      |      |      |      |      |
| 78.2                       | 0.0                  | 0.0                       | 3.49                 |      |      |      |      |      |      |      |      |      |      |
| 78.2                       | 0.0                  | 0.0                       | 3.49                 |      |      |      |      |      |      |      |      |      |      |
| 263.9                      | 0.0                  | 0.0                       | 0.00                 |      |      |      |      |      |      |      |      |      |      |
| 346.4                      | 0.0                  | 0.0                       | 0.00                 |      |      |      |      |      |      |      |      |      |      |
| 348.8                      | 0.0                  | 0.0                       | 6.29                 |      |      |      |      |      |      |      |      |      |      |
| 348.8                      | 0.0                  | 0.0                       | 6.29                 |      |      |      |      |      |      |      |      |      |      |
| 380.6                      | 0.0                  | 0.0                       | 0.00                 |      |      |      |      |      |      |      |      |      |      |
| 468.7                      | 0.0                  | 0.0                       | 10.50                |      |      |      |      |      |      |      |      |      |      |
| 468.7                      | 0.0                  | 0.0                       | 10.50                |      |      |      |      |      |      |      |      |      |      |

**Table S16.** Energies ( $\text{cm}^{-1}$ ), percentage composition of the CASSCF/RASSI wavefunctions and the principal  $g$  values of **1-Yb**.

| Energy ( $\text{cm}^{-1}$ ) | $ m_J\rangle$ |      |      |      |      |      |      |      |
|-----------------------------|---------------|------|------|------|------|------|------|------|
|                             | 7/2           | 5/2  | 3/2  | 1/2  | -1/2 | -3/2 | -5/2 | -7/2 |
| 0.00                        | 15.7          | 0.0  | 0.0  | 61.4 | 0.0  | 0.0  | 22.9 | 0.0  |
| 288.9                       | 0.0           | 0.0  | 93.0 | 0.0  | 0.0  | 7.0  | 0.0  | 0.0  |
| 304.6                       | 3.2           | 53.6 | 0.0  | 3.9  | 9.4  | 0.0  | 22.1 | 7.8  |
| 526.3                       | 1.5           | 1.4  | 0.0  | 0.5  | 24.8 | 0.0  | 0.0  | 71.8 |

  

| Energy ( $\text{cm}^{-1}$ ) | Principal $g$ values |       |       |
|-----------------------------|----------------------|-------|-------|
|                             | $g_x$                | $g_y$ | $g_z$ |
| 0.00                        | 3.94                 | 0.66  | 3.94  |
| 288.9                       | 3.41                 | 0.00  | 0.00  |
| 304.6                       | 3.29                 | 1.11  | 1.11  |
| 526.3                       | 6.07                 | 1.73  | 1.73  |

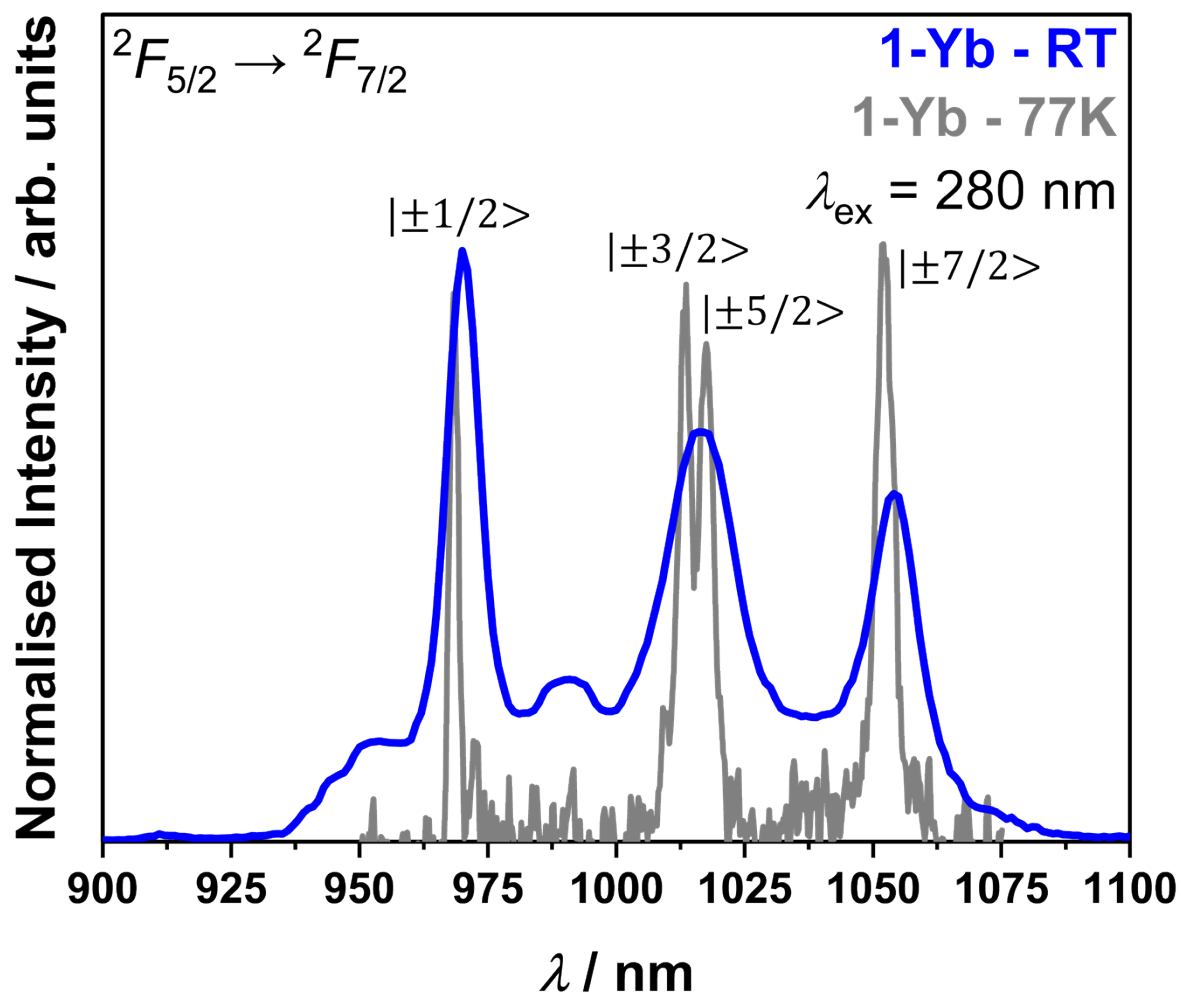

**Figure S28.** Emission spectra of compound **1-Yb-0.5MeCN** at room temperature (blue) and 77 K (grey). Excited at 280 nm.
